# Supplementary material
Source: PubMed Central journal article supplement (PMC10699485)
Supplement: JCOPDF-10-380-s001.pdf [file JCOPDF-10-380-s001.pdf]

## Online Supplement

### Chymotrypsin-like Elastase-1 Mediates Progressive Emphysema in Alpha-1 Antitrypsin Deficiency

Andrew J. Devine, BS\*<sup>1</sup> Noah J. Smith, BS\*<sup>2</sup> Rashika Joshi, MD<sup>1</sup> Qiang Fan, PhD<sup>1</sup> Michael T. Borchers, PhD<sup>1,3</sup> Jeremy C. Clair, PhD<sup>4</sup> Joshua N. Adkins, PhD<sup>4</sup> Brian M. Varisco, MD<sup>1,2</sup>

<sup>1</sup> Division of Critical Care Medicine, Cincinnati Children's Hospital Medical Center, Cincinnati, Ohio, United States

<sup>2</sup> University of Cincinnati School of Medicine, Cincinnati, Ohio, United States

<sup>3</sup> Division of Pulmonary and Critical Care Medicine, University of Cincinnati, Cincinnati, Ohio, United States

<sup>4</sup> Pacific Northwest National Laboratory, Richland, Washington, United States

\* *Authors contributed equally*

## Supplemental Table 1: Genes 2-fold increased or decreased protein abundance in AAT-deficient vs wildtype lungs

| Two-fold reduced in AAT-deficient compared to wildtype           | adjusted p-value | log(AAT/WT)  | Two-fold increased in AAT-deficient compared to wildtype          | adjusted p-value | log(AAT/WT) |
|------------------------------------------------------------------|------------------|--------------|-------------------------------------------------------------------|------------------|-------------|
| Alpha-1-antitrypsin 1-4                                          | 0.005402969      | -7.658939793 | Very-long-chain (3R)-3-hydroxyacyl-CoA dehydratase 2              | 0.635451325      | 4.356620473 |
| Alpha-1-antitrypsin 1-1                                          | 0.104629553      | -4.127926977 | Septin-5                                                          | 0.814392232      | 2.569137722 |
| Alpha-1-antitrypsin 1-2                                          | 0.24021247       | -3.840431444 | Mannose-6-phosphate isomerase                                     | 0.814392232      | 2.409962705 |
| CapZ-interacting protein                                         | 0.76976043       | -2.962319502 | Endoplasmic reticulum metalloproteinase 1                         | 0.706555434      | 2.202271146 |
| Phosphatidylinositol 5-phosphate 4-kinase type-2 alpha           | 0.710098202      | -2.818698064 | SLIT-ROBO Rho GTPase-activating protein 2                         | 0.814392232      | 2.155599029 |
| Ubiquinone biosynthesis monooxygenase COQ6, mitochondrial        | 0.548562953      | -2.526899803 | Carboxypeptidase Q                                                | 0.814392232      | 2.118892851 |
| USP6 N-terminal-like protein                                     | 0.76976043       | -2.320869555 | Golgin subfamily A member 2                                       | 0.814392232      | 2.110520803 |
| Geranylgeranyl pyrophosphate synthase                            | 0.635451325      | -2.241314546 | Collagen alpha-2(V) chain                                         | 0.814392232      | 2.050161614 |
| Histone H2A type 1-F                                             | 0.710098202      | -1.869754004 | Plasma kallikrein                                                 | 0.814392232      | 2.037018714 |
| Nuclear autoantigen Sp-100                                       | 0.716466787      | -1.680303091 | Transmembrane protein 256                                         | 0.787335326      | 1.999844798 |
| CD99 antigen                                                     | 0.706555434      | -1.256946612 | Ubiquitin-like domain-containing CTD phosphatase 1                | 0.814392232      | 1.983197913 |
| [Pyruvate dehydrogenase (acetyl-transferring)] kinase isozyme 2, | 0.76976043       | -1.215477898 | Active breakpoint cluster region-related protein                  | 0.710098202      | 1.964948073 |
| Non-histone chromosomal protein HMG-14                           | 0.76976043       | -1.201008833 | Zinc finger and BTB domain-containing protein 20                  | 0.836830423      | 1.922906569 |
| Ras-specific guanine nucleotide-releasing factor 2               | 0.76976043       | -1.167508425 | Matrix metalloproteinase-9                                        | 0.814392232      | 1.899151387 |
| cAMP-dependent protein kinase type II-beta regulatory subunit    | 0.670739978      | -1.100712009 | Gamma-interferon-inducible lysosomal thiol reductase              | 0.814392232      | 1.84450418  |
| Ig heavy chain V region AC38 205.12                              | 0.772417645      | -1.055441928 | Serum amyloid A-4 protein                                         | 0.814392232      | 1.79859424  |
| Enhancer of rudimentary homolog                                  | 0.635451325      | -1.036661021 | Complement C2                                                     | 0.710098202      | 1.791135782 |
|                                                                  |                  |              | Prefoldin subunit 3                                               | 0.799651701      | 1.76560095  |
|                                                                  |                  |              | Alpha-1-acid glycoprotein 1                                       | 0.786781732      | 1.746757615 |
|                                                                  |                  |              | Dynein light chain Tctex-type 3                                   | 0.799651701      | 1.653570064 |
|                                                                  |                  |              | Secretory carrier-associated membrane protein 1                   | 0.836830423      | 1.631691006 |
|                                                                  |                  |              | SH3 domain-containing kinase-binding protein 1                    | 0.799651701      | 1.626019142 |
|                                                                  |                  |              | Mitochondrial import receptor subunit TOM40 homolog               | 0.814392232      | 1.601646268 |
|                                                                  |                  |              | Cytoplasmic dynein 2 heavy chain 1                                | 0.793717161      | 1.597597047 |
|                                                                  |                  |              | IST1 homolog                                                      | 0.814392232      | 1.587979889 |
|                                                                  |                  |              | Plakophilin-2                                                     | 0.706555434      | 1.575039769 |
|                                                                  |                  |              | Aldehyde oxidase 1                                                | 0.814392232      | 1.517322151 |
|                                                                  |                  |              | Double-strand-break repair protein rad21 homolog                  | 0.836830423      | 1.506272632 |
|                                                                  |                  |              | Disks large-associated protein 4                                  | 0.814392232      | 1.476735135 |
|                                                                  |                  |              | RNA helicase aquarius                                             | 0.799651701      | 1.460264526 |
|                                                                  |                  |              | AP-1 complex subunit mu-2                                         | 0.836830423      | 1.363440153 |
|                                                                  |                  |              | Centrin-2                                                         | 0.799651701      | 1.359339453 |
|                                                                  |                  |              | Epidermal growth factor receptor                                  | 0.832446546      | 1.358962695 |
|                                                                  |                  |              | Conserved oligomeric Golgi complex subunit 1                      | 0.814392232      | 1.348375208 |
|                                                                  |                  |              | Volume-regulated anion channel subunit LRRC8C                     | 0.814392232      | 1.330912411 |
|                                                                  |                  |              | BolA-like protein 2                                               | 0.814392232      | 1.316034624 |
|                                                                  |                  |              | Bifunctional epoxide hydrolase 2                                  | 0.814392232      | 1.31568963  |
|                                                                  |                  |              | C-type lectin domain family 11 member A                           | 0.706555434      | 1.284167018 |
|                                                                  |                  |              | DnaJ homolog subfamily B member 11                                | 0.836830423      | 1.279985812 |
|                                                                  |                  |              | Actin-related protein 2/3 complex subunit 5-like protein          | 0.814392232      | 1.272532949 |
|                                                                  |                  |              | Transmembrane protein 214                                         | 0.799651701      | 1.25521081  |
|                                                                  |                  |              | Retinoid-inducible serine carboxypeptidase                        | 0.814979184      | 1.253613023 |
|                                                                  |                  |              | H-2 class II histocompatibility antigen gamma chain               | 0.814392232      | 1.250222229 |
|                                                                  |                  |              | Protein AMBP                                                      | 0.848218401      | 1.24815933  |
|                                                                  |                  |              | Collagen alpha-1(VIII) chain                                      | 0.814392232      | 1.243450557 |
|                                                                  |                  |              | Regulator complex protein 1AMTOR5                                 | 0.841242473      | 1.234339674 |
|                                                                  |                  |              | Interferon-induced helicase C domain-containing protein 1         | 0.814392232      | 1.228872136 |
|                                                                  |                  |              | WD repeat-containing protein 82                                   | 0.814392232      | 1.208879749 |
|                                                                  |                  |              | E3 ubiquitin-protein ligase HECTD1                                | 0.814392232      | 1.205309685 |
|                                                                  |                  |              | Serine protease 56                                                | 0.821064821      | 1.197847018 |
|                                                                  |                  |              | AH receptor-interacting protein                                   | 0.832446546      | 1.197386863 |
|                                                                  |                  |              | Haptoglobin                                                       | 0.76976043       | 1.188611838 |
|                                                                  |                  |              | U6 snRNA-associated Sm-like protein Lsm2                          | 0.814392232      | 1.168714164 |
|                                                                  |                  |              | Neutrophil gelatinase-associated lipocalin                        | 0.814392232      | 1.152929464 |
|                                                                  |                  |              | Charged multivesicular body protein 2a                            | 0.799651701      | 1.146736093 |
|                                                                  |                  |              | GTP-binding protein Rit1                                          | 0.849719788      | 1.140625331 |
|                                                                  |                  |              | Polyprenol reductase                                              | 0.814392232      | 1.139162093 |
|                                                                  |                  |              | Integrin alpha-M                                                  | 0.814392232      | 1.111257911 |
|                                                                  |                  |              | Bromodomain-containing protein 4;Bromodomain-containing protein 3 | 0.814392232      | 1.094684836 |

## Supplemental Table 2: Genes 2-fold increased or decreased protein abundance in Cela1&AAT-deficient vs AAT-deficient lungs

| <u>Two-fold decreased in Cela1&amp;AAT-deficient compared to AAT-deficient</u> | adjusted p-value | log(DKO/AAT) | <u>Two-fold increased in Cela1&amp;AAT-deficient compared to AAT-deficient</u>              | adjusted p-value | log(DKO/AAT) |
|--------------------------------------------------------------------------------|------------------|--------------|---------------------------------------------------------------------------------------------|------------------|--------------|
| Very-long-chain (3R)-3-hydroxyacyl-CoA dehydratase 2                           | 0.635451325      | -4.356620473 | USP6 N-terminal-like protein                                                                | 0.76976043       | 2.320869555  |
| Septin-5                                                                       | 0.814392232      | -2.569137722 | RNA-binding motif protein, X chromosome                                                     | 0.814392232      | 2.28054377   |
| Mannose-6-phosphate isomerase                                                  | 0.814392232      | -2.409962705 | Geranylgeranyl pyrophosphate synthase                                                       | 0.635451325      | 2.241314546  |
| Zinc finger and BTB domain-containing protein 20                               | 0.836830423      | -1.922906569 | Septin-10                                                                                   | 0.814392232      | 2.171613508  |
| Matrix metalloproteinase-9                                                     | 0.814392232      | -1.899151387 | Polyadenylate-binding protein 2                                                             | 0.814392232      | 1.76735785   |
| Serum amyloid A-4 protein                                                      | 0.814392232      | -1.79859424  | Protein phosphatase 1 regulatory subunit 12B                                                | 0.814392232      | 1.757948104  |
| Prefoldin subunit 3                                                            | 0.799651701      | -1.76560095  | Homer protein homolog 3                                                                     | 0.814392232      | 1.751469843  |
| Alpha-1-acid glycoprotein 1                                                    | 0.786781732      | -1.746757615 | PRKC apoptosis WT1 regulator protein                                                        | 0.814392232      | 1.624204285  |
| Plakophilin-2                                                                  | 0.706555434      | -1.575039769 | E3 ubiquitin-protein ligase Itchy                                                           | 0.814392232      | 1.606612821  |
| Double-strand-break repair protein rad21 homolog                               | 0.836830423      | -1.506272632 | Alpha-1,3/1,6-mannosyltransferase ALG2                                                      | 0.814392232      | 1.592098663  |
| Disks large-associated protein 4                                               | 0.814392232      | -1.476735135 | Nostrin                                                                                     | 0.814392232      | 1.580235527  |
| BolA-like protein 2                                                            | 0.814392232      | -1.316034624 | NHP2-like protein 1                                                                         | 0.814392232      | 1.535833642  |
| C-type lectin domain family 11 member A                                        | 0.706555434      | -1.284167018 | ER membrane protein complex subunit 7                                                       | 0.814392232      | 1.534010735  |
| Actin-related protein 2/3 complex subunit 5-like protein                       | 0.814392232      | -1.272532949 | Dynactin subunit 3                                                                          | 0.836830423      | 1.481142994  |
| Serine protease 56                                                             | 0.821064821      | -1.197847018 | Equilibrative nucleobase transporter 1                                                      | 0.814392232      | 1.443035311  |
| U6 snRNA-associated Sm-like protein LSm2                                       | 0.814392232      | -1.168714164 | 60S ribosomal protein L36                                                                   | 0.816225412      | 1.425669401  |
| Bromodomain-containing protein 4;Bromodomain-containing protein 3              | 0.814392232      | -1.094684836 | LIM and cysteine-rich domains protein 1                                                     | 0.814392232      | 1.398942749  |
| Vacuolar protein sorting-associated protein VTA1 homolog                       | 0.835350159      | -0.966865802 | Sphingosine-1-phosphate lyase 1                                                             | 0.814392232      | 1.377943636  |
| Tumor protein p63-regulated gene 1-like protein                                | 0.814392232      | -0.963464717 | Palmdelphin                                                                                 | 0.814392232      | 1.365293779  |
|                                                                                |                  |              | Cytoglobin                                                                                  | 0.814392232      | 1.280099477  |
|                                                                                |                  |              | Serine protease HTRA2, mitochondrial                                                        | 0.821183794      | 1.219441125  |
|                                                                                |                  |              | Vacuolar protein sorting-associated protein 33A                                             | 0.847893608      | 1.215416973  |
|                                                                                |                  |              | Oxidation resistance protein 1                                                              | 0.814392232      | 1.194977614  |
|                                                                                |                  |              | PTB domain-containing engulfment adapter protein 1                                          | 0.836830423      | 1.068995294  |
|                                                                                |                  |              | Ig heavy chain V region AC38 205.12;Ig heavy chain V region J558;Ig heavy chain V region MO | 0.772417645      | 1.055441928  |
|                                                                                |                  |              | Calcineurin B homologous protein 1                                                          | 0.836830423      | 1.053178882  |
|                                                                                |                  |              | TIP41-like protein                                                                          | 0.836830423      | 1.04728927   |
|                                                                                |                  |              | Malectin                                                                                    | 0.833615817      | 0.981350537  |

## Supplemental Figure Titles and Legends

Figure S1: Titration in Lipopolysaccharide Model of AAT-deficient Emphysema. (A) Middle lobe sections of AAT-deficient mice treated with PBS (B) 1 unit of LPS at day 1 and 0.5 units at day 10 (C) 2 and 1 units, (D) 5 & 2.5 units, and (E) 10 & 5 units. (F) Middle lobes of wildtype (WT) mice treated with 10 & 5 units of LPS. (G) Airspace diameter percentile values of tile scanned lung lobe sections of the mice above showing that emphysema was no worse in *AAT*-deficient mice than WT.

Figure S2: Titration of tracheal PPE in *AAT*-deficient Mice. Tile scanned images of *AAT*-deficient (*AAT*) and wildtype (WT) mice 21 days after different doses of porcine pancreatic elastase (PPE). *AAT* mice had evidence of substantial emphysema at the lowest tested dose (0.25 units).

Figure S3: Complete Protein-protein Interaction Network for *AAT*<sup>-/-</sup> vs wildtype mice. The complete protein-protein interaction network of proteins with significantly different abundance between *AAT*-deficient and wildtype mouse lungs 42 days after low-dose tracheal PPE.

Figure S4: Complete Protein-protein Interaction Network for *AAT*<sup>-/-</sup> & *Cela1*<sup>-/-</sup> mice vs *AAT*<sup>-/-</sup> mice. The complete protein-protein interaction network of proteins with significantly different abundance between *AAT*<sup>-/-</sup> & *Cela1*<sup>-/-</sup> vs *AAT*<sup>-/-</sup> mouse lungs 42 days after low-dose tracheal P

Supplemental Figure 1

AAT KO PBS

A

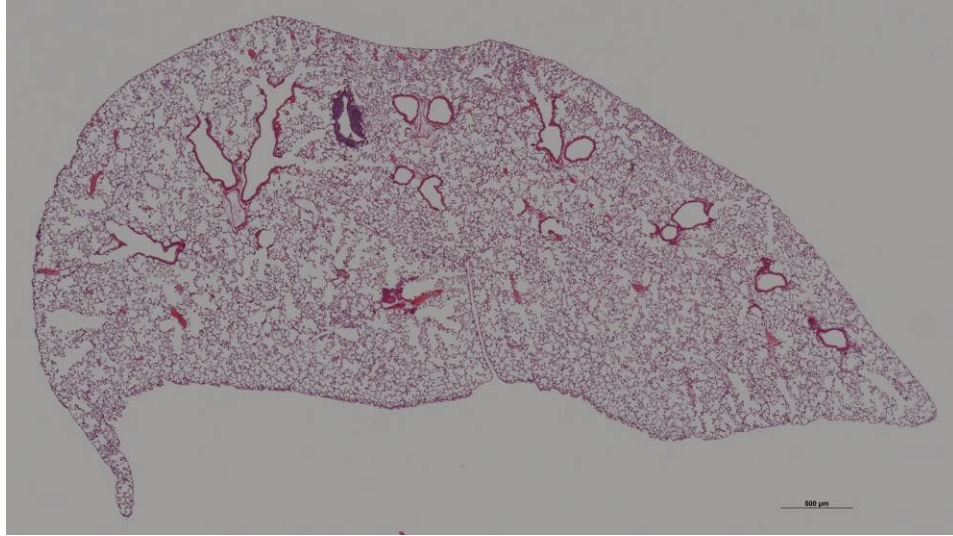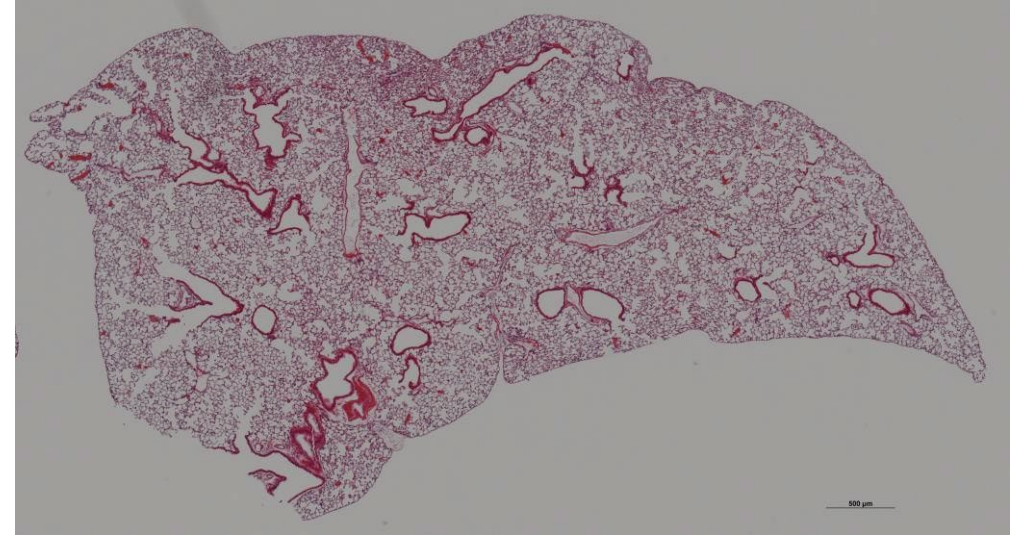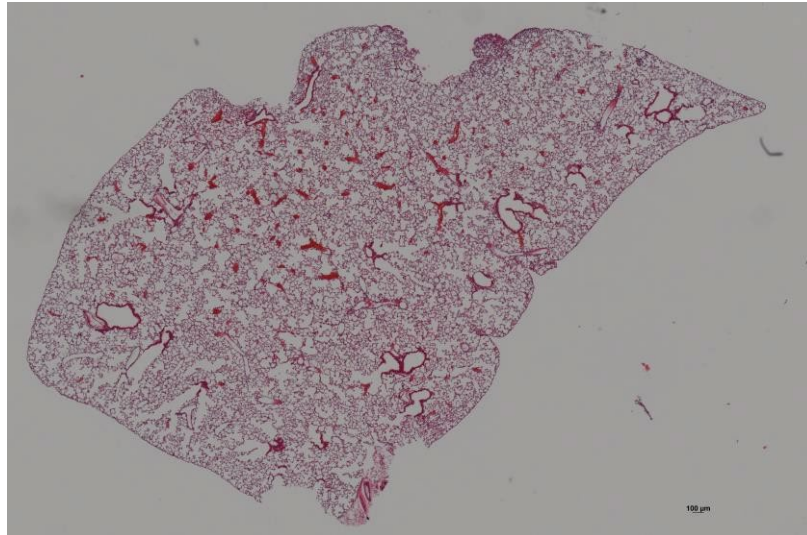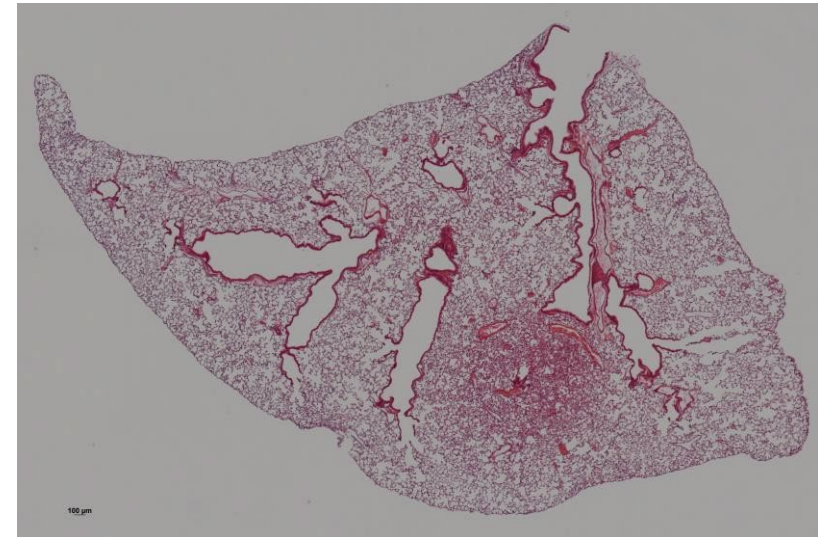

WT 21 days 1&0.5 Units LPS

B

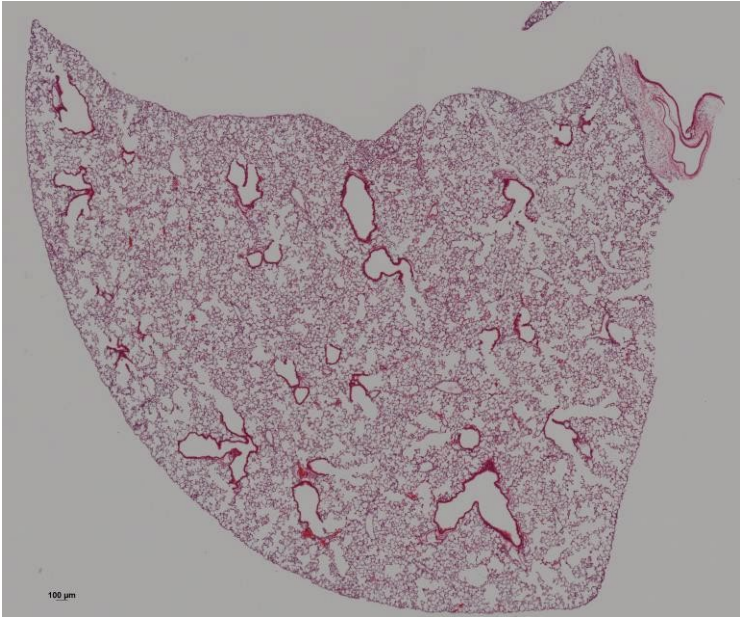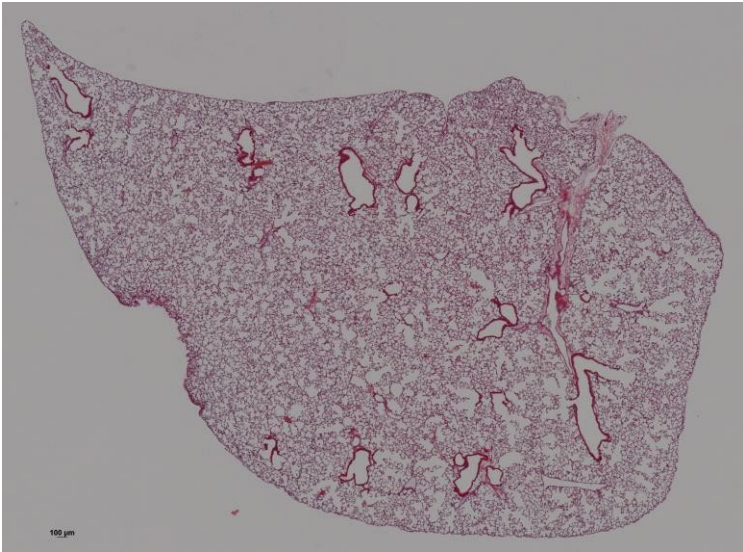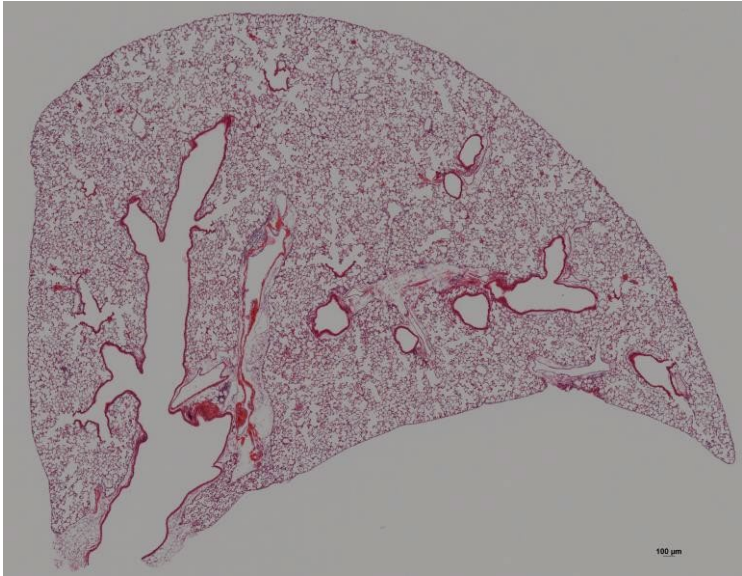

AAT KO 21 days 1&0.5 Units LPS

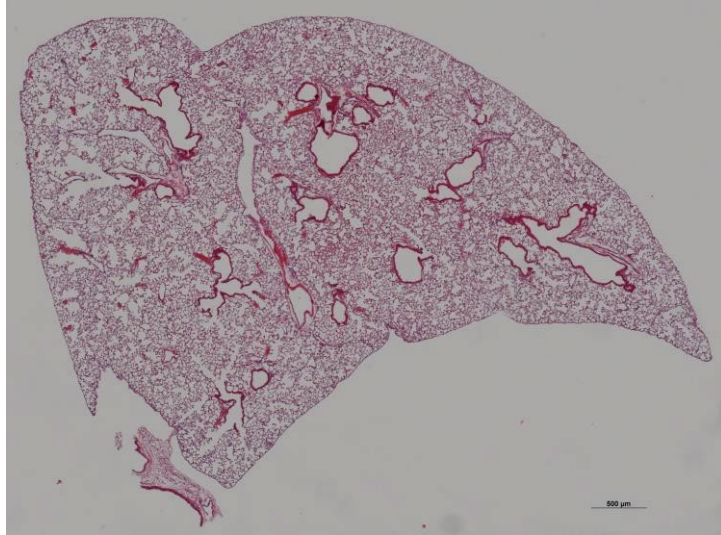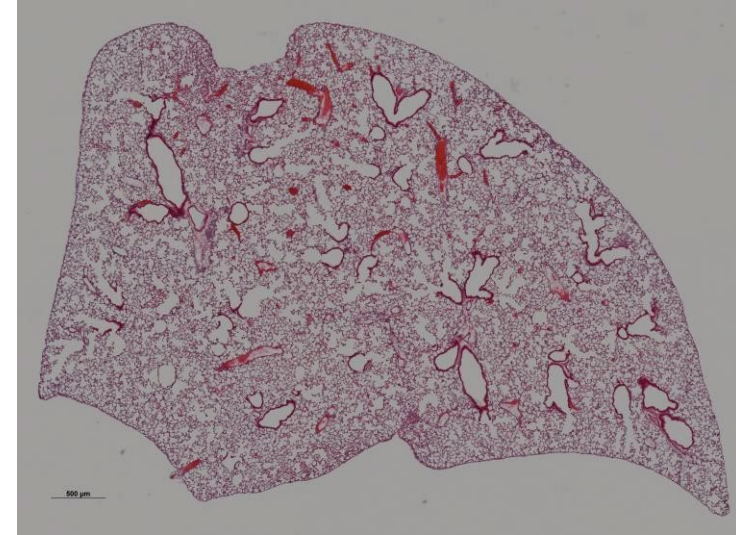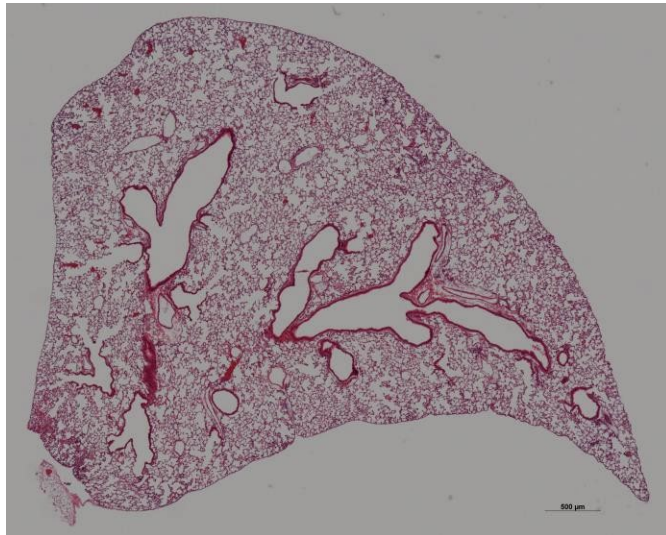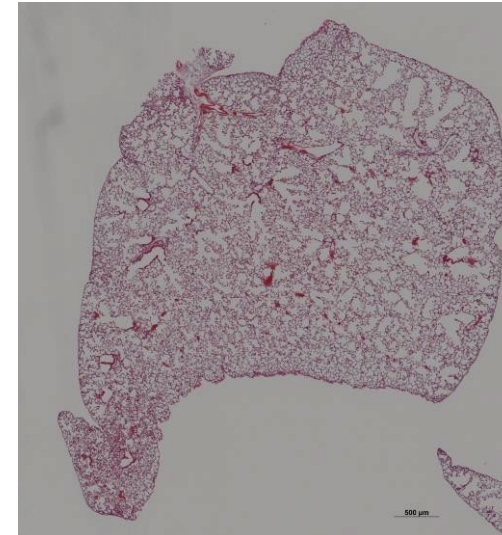

C

AAT KO 2&1 Units LPS

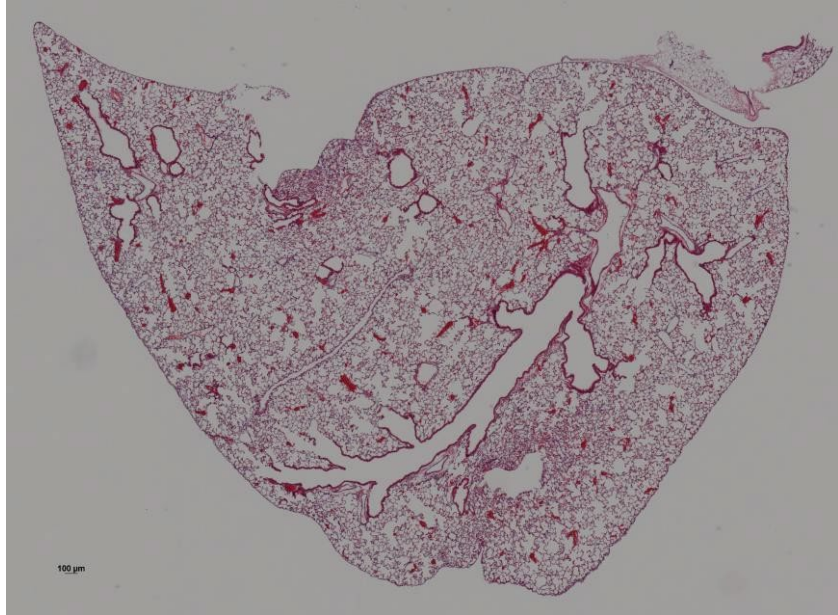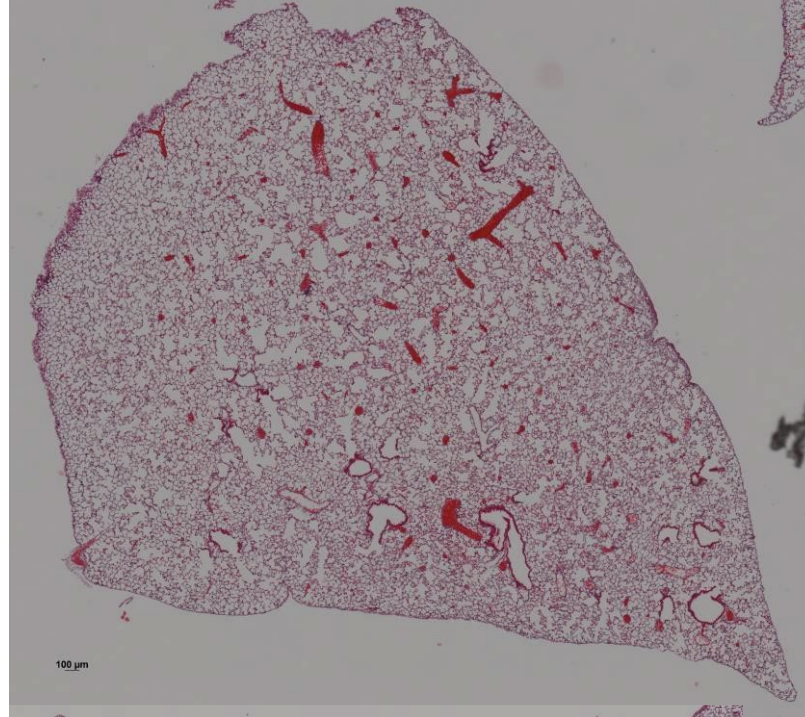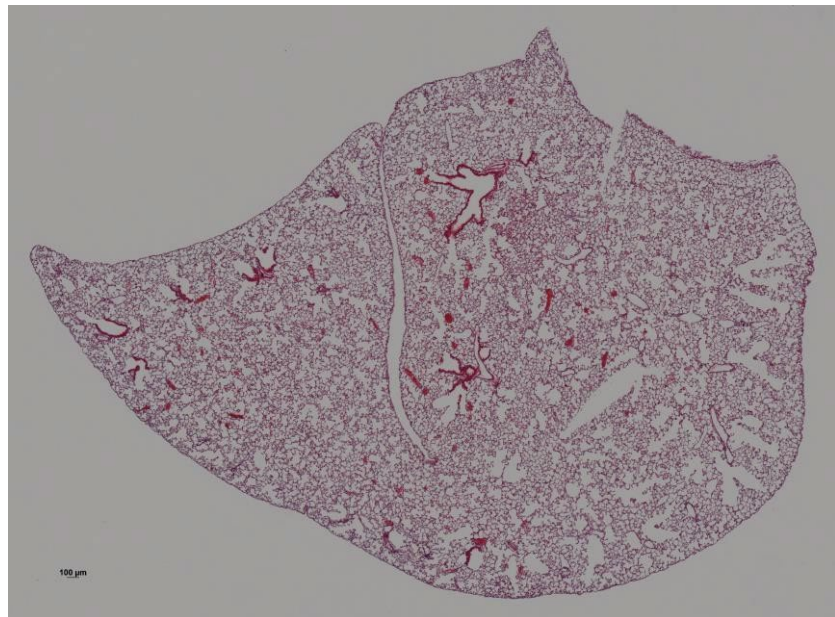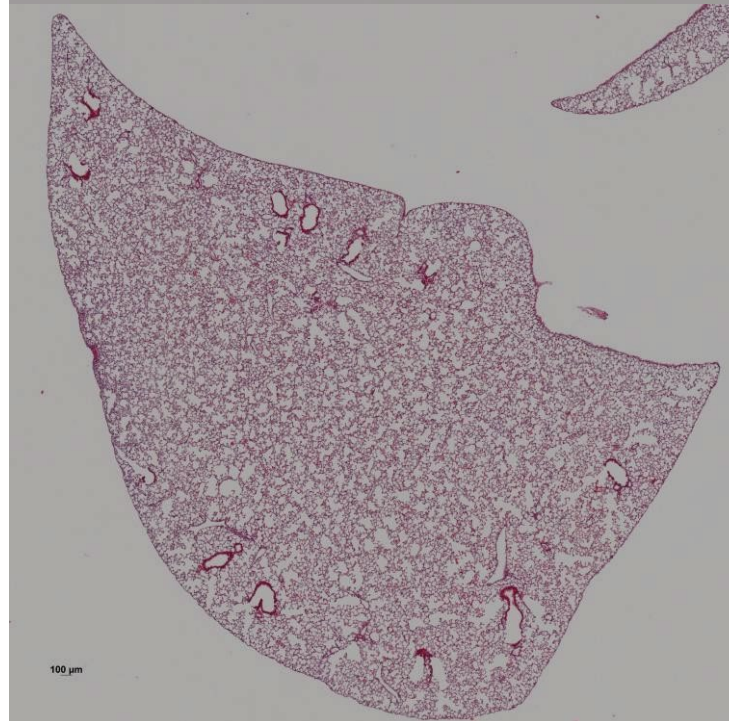



AAT KO 5&2.5 Units LPS

D

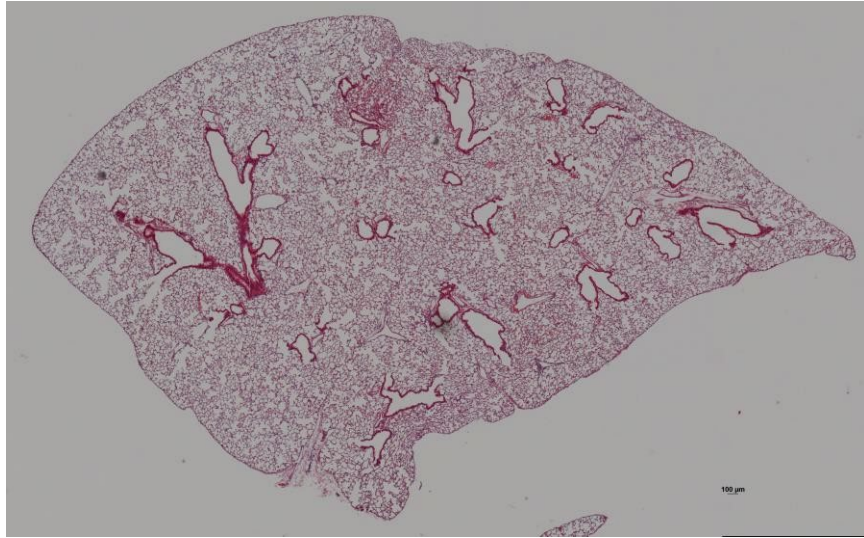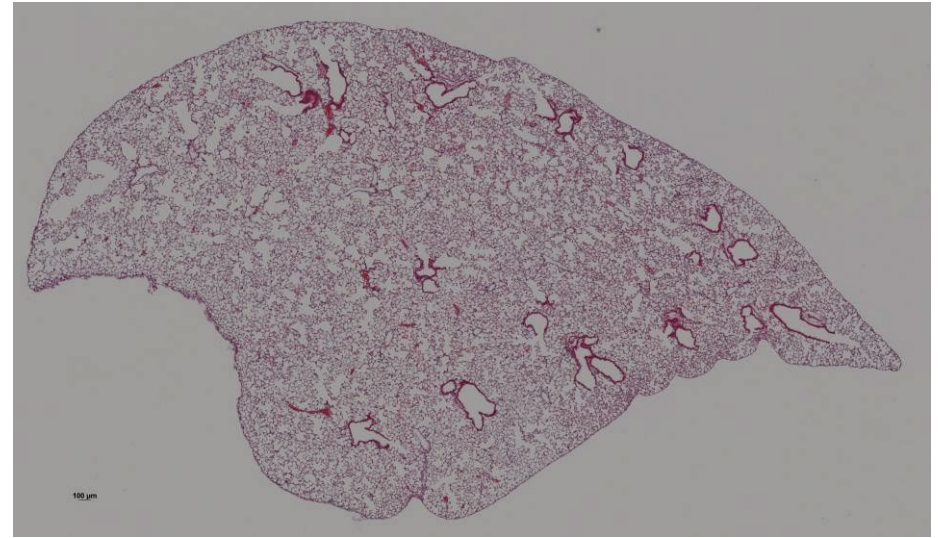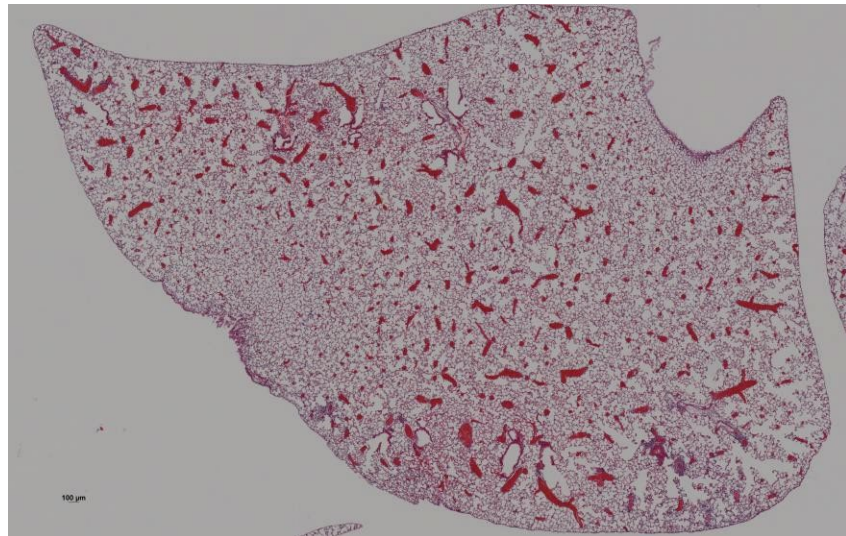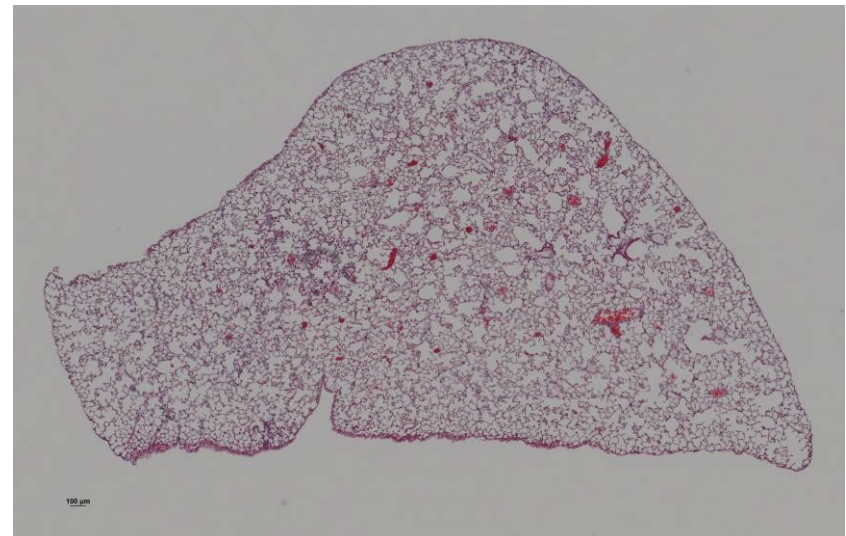

E

AAT KO 10&5 Units LPS

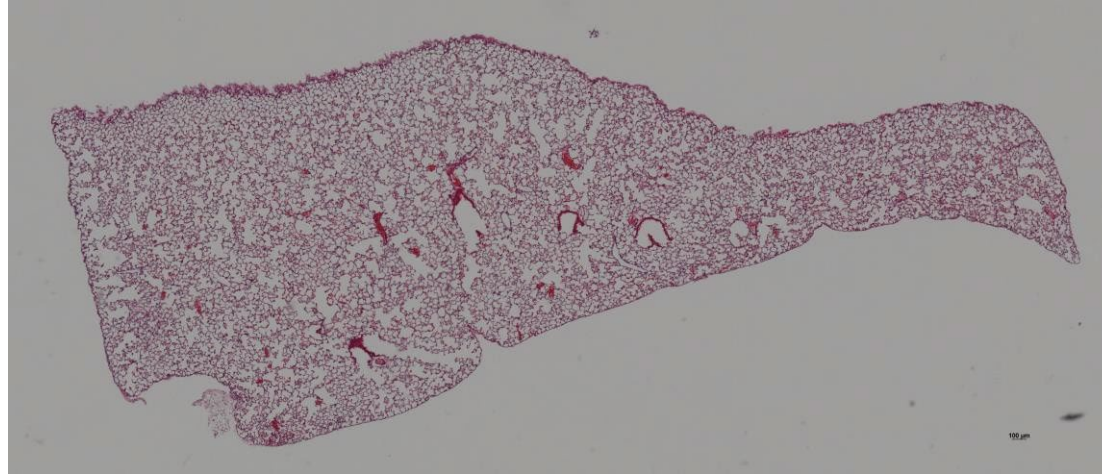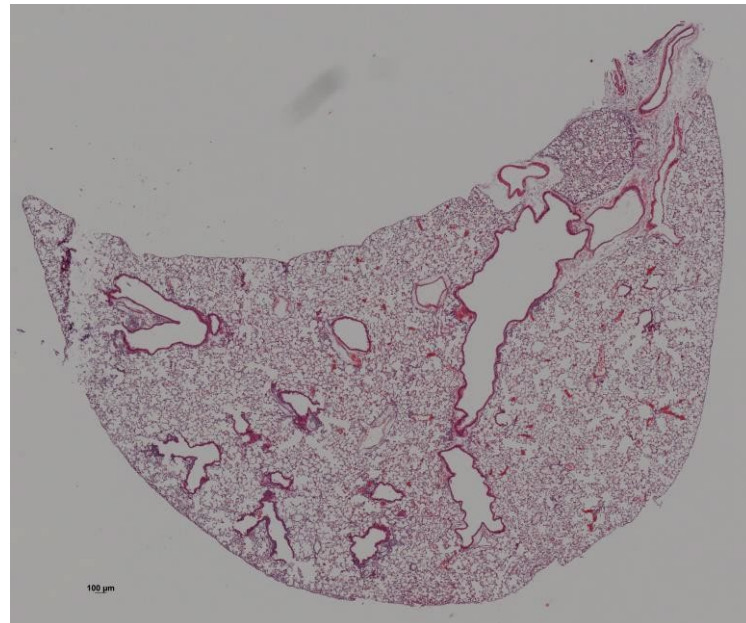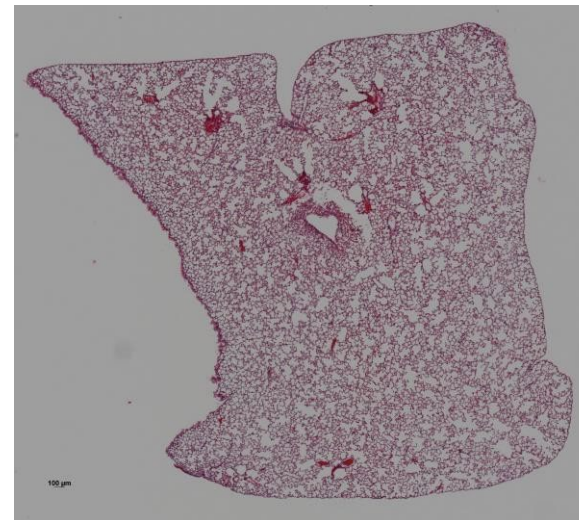

F

WT 10&5 Units LPS

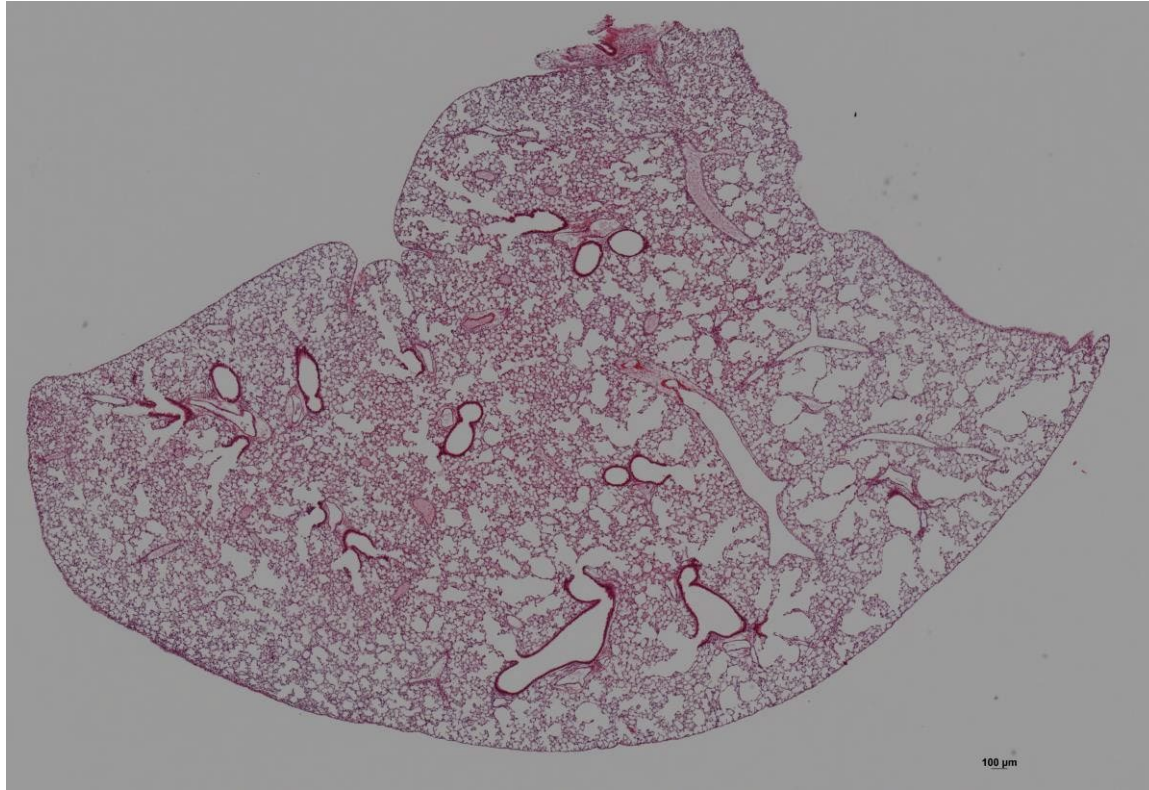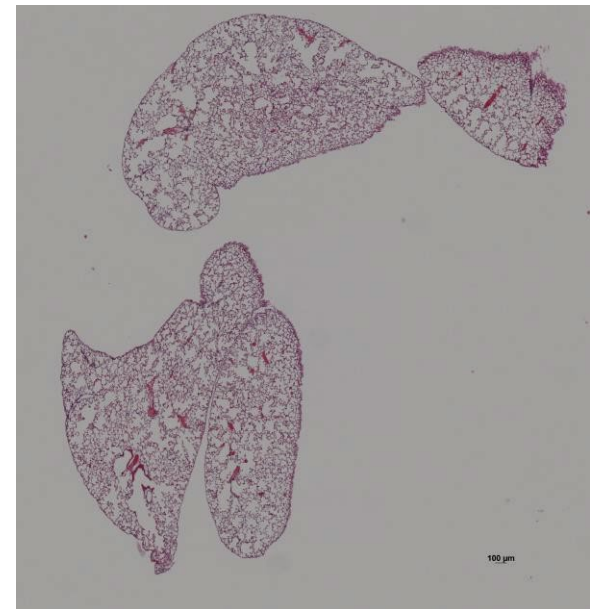

G

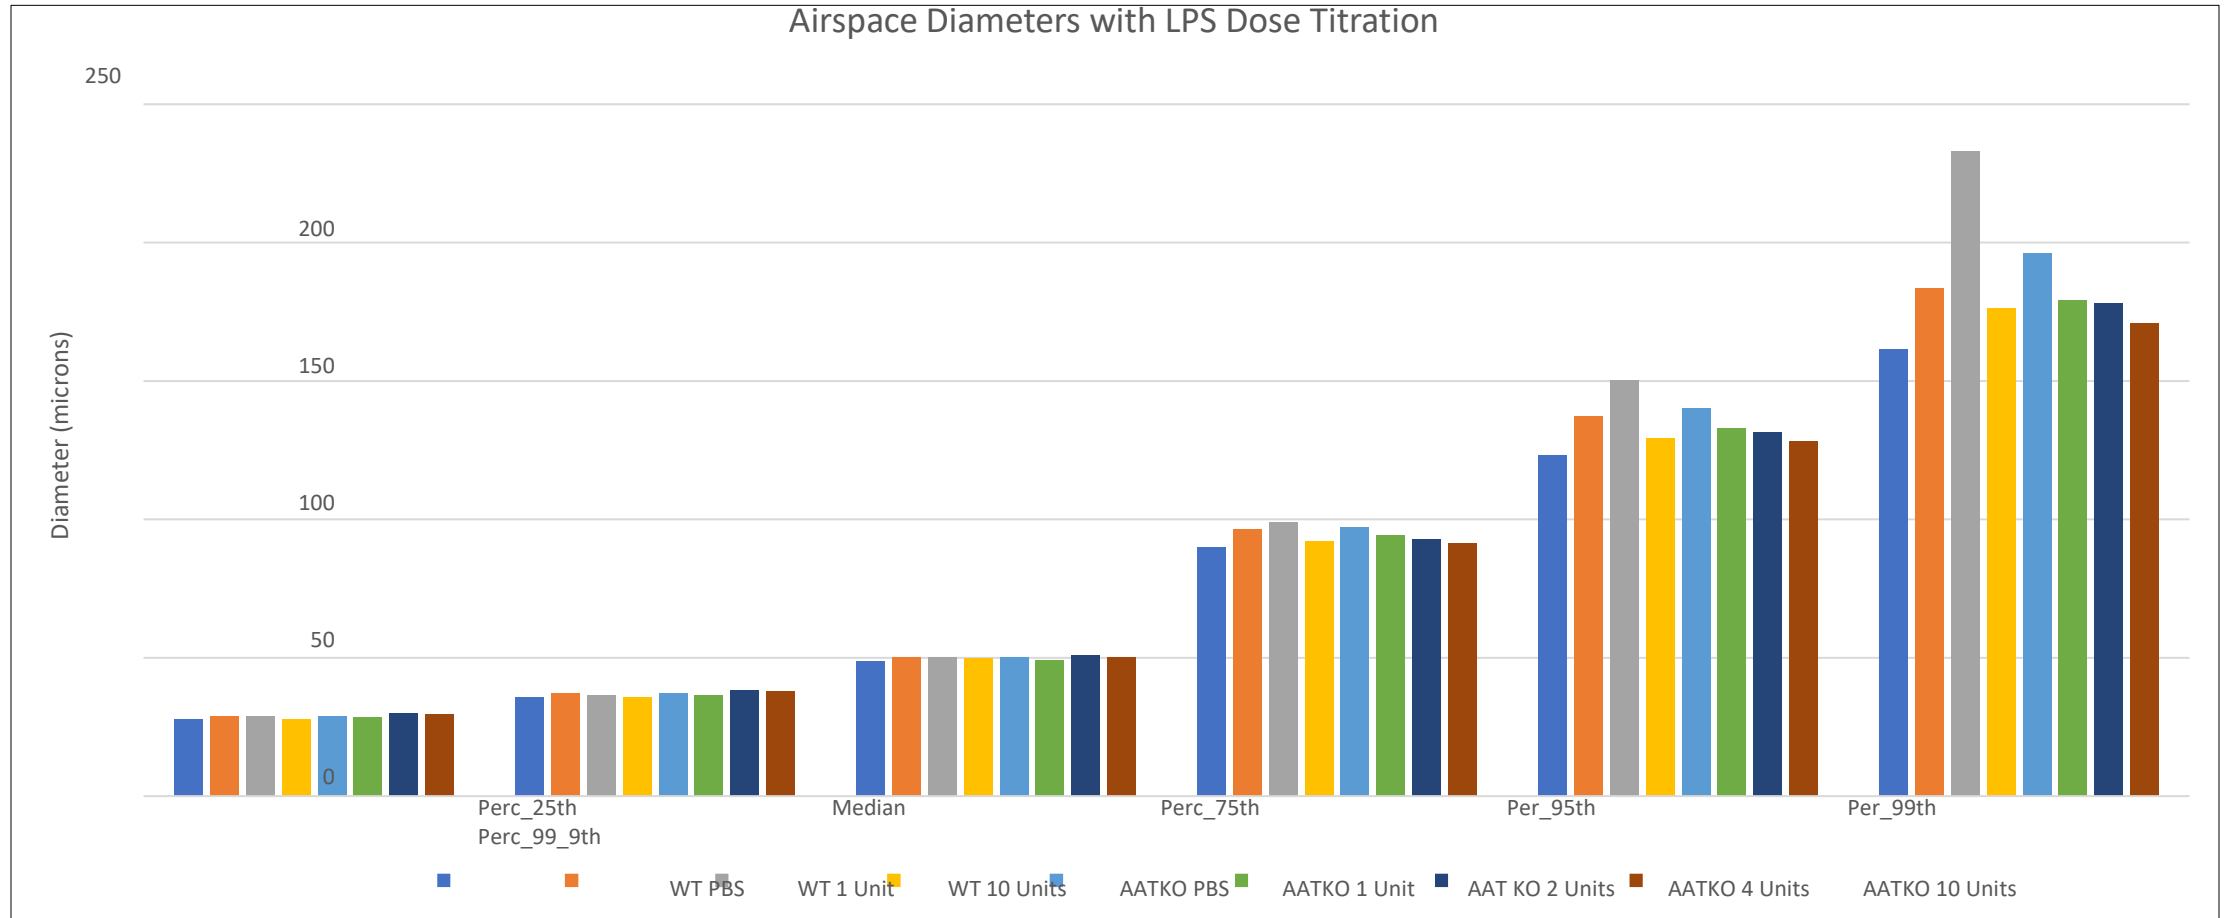

# Titration of Tracheal PPE Dose in AAT-deficient Mice

2659 AAT-KO 0.25 U

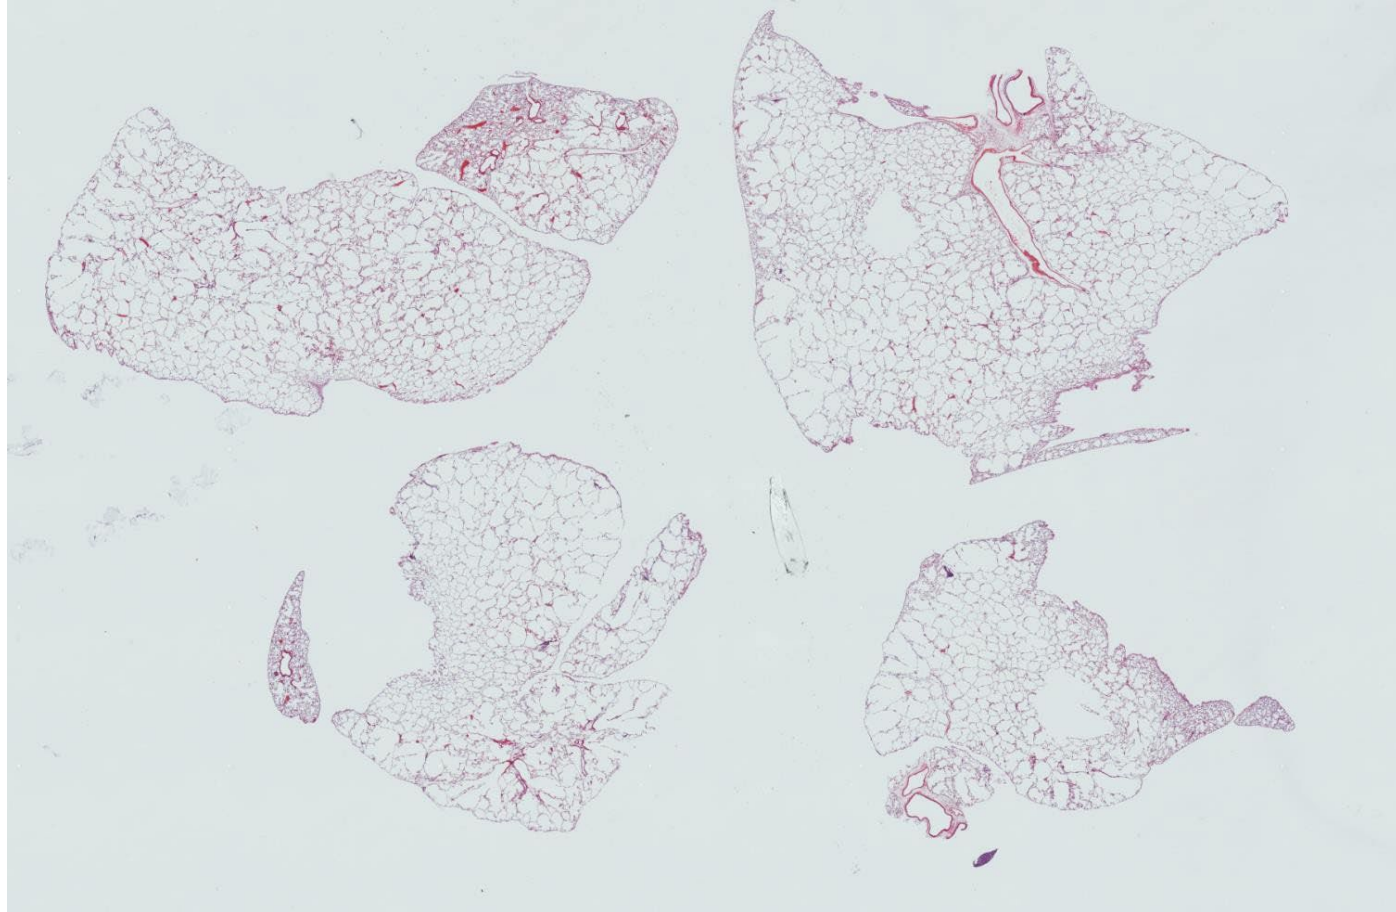

2683 AAT-KO 0.25 U

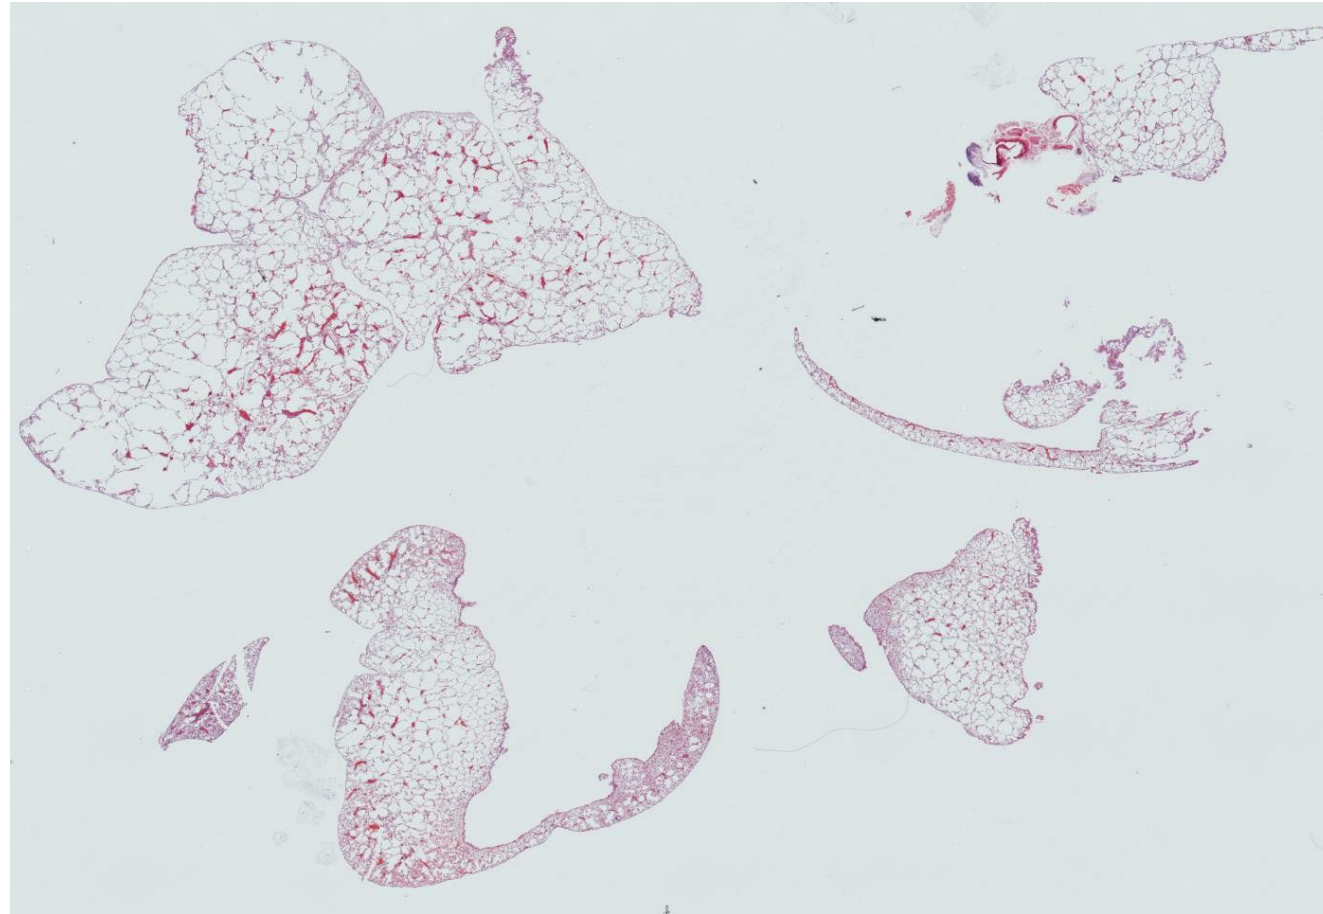

2688 AAT-KO 0.25 U

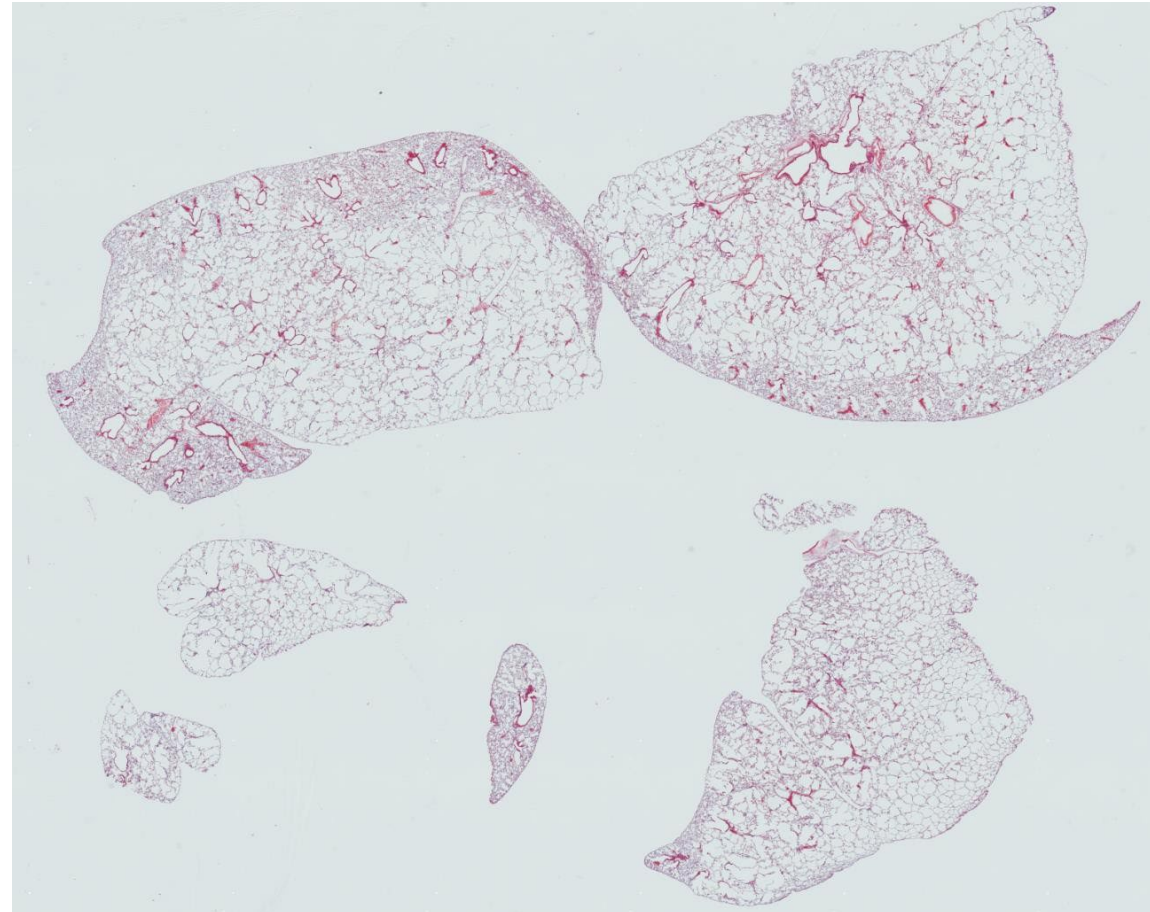



2724 AAT-KO 0.5 U

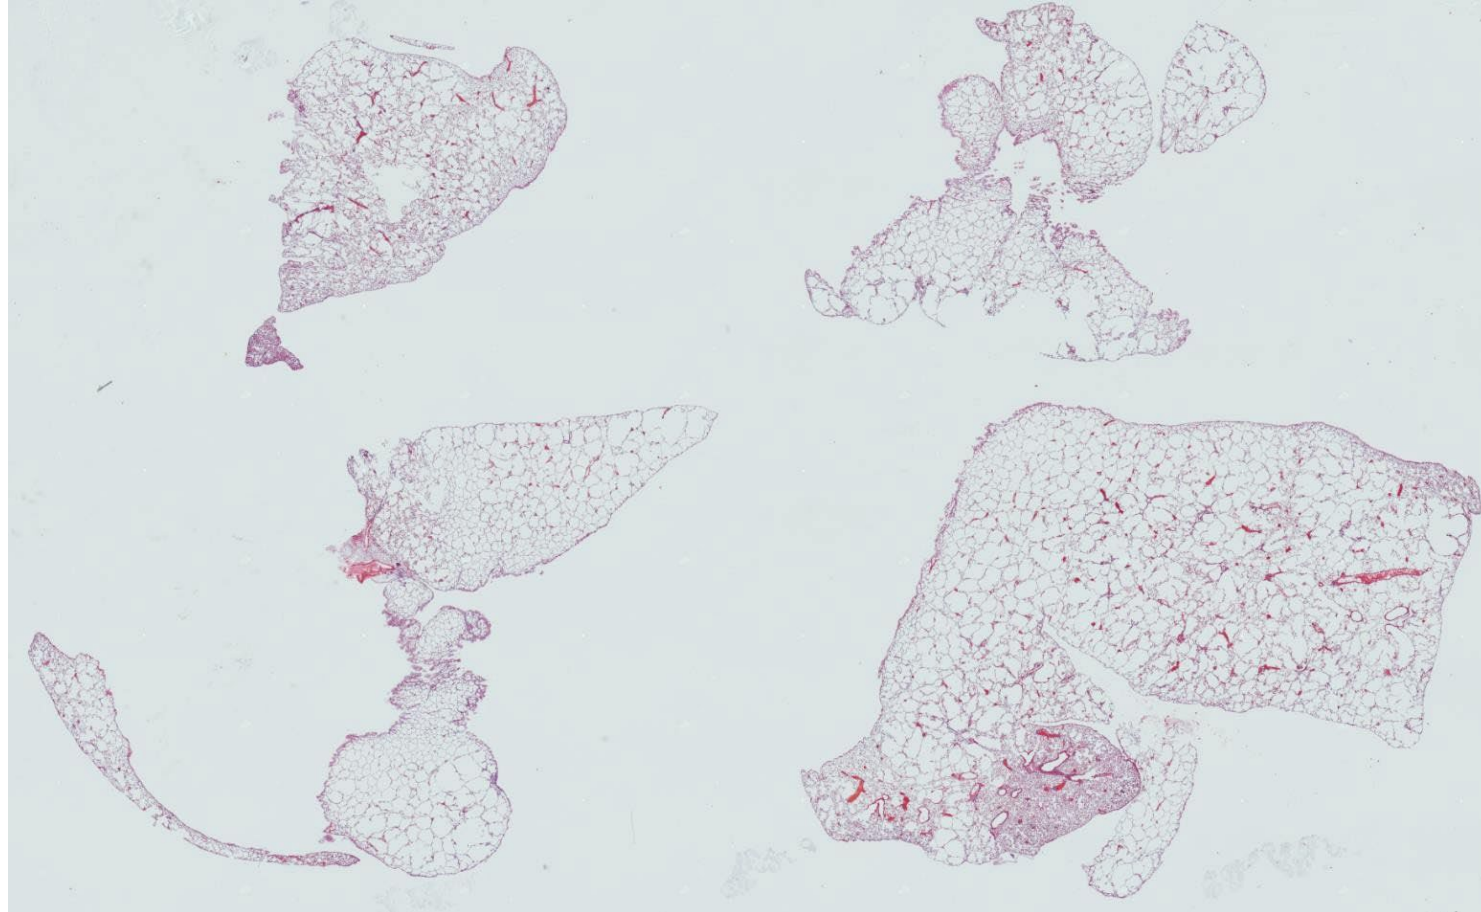

2725 AAT-KO 0.5 U

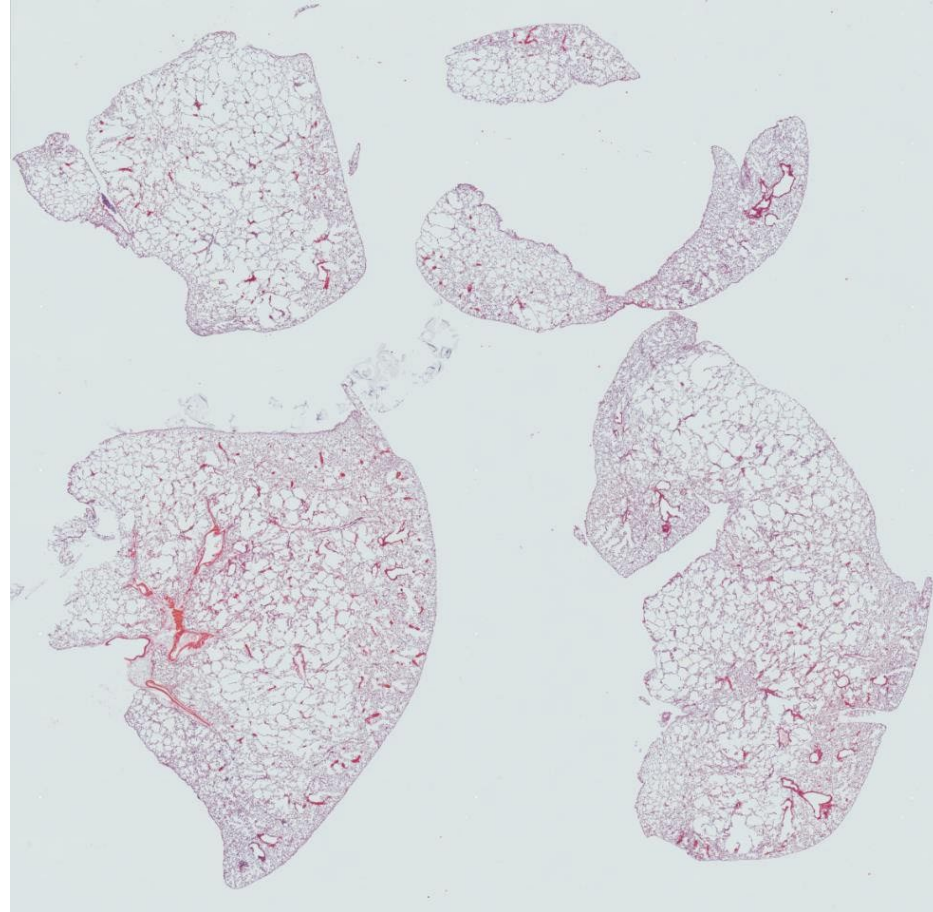

2726 AAT-KO 0.5 U

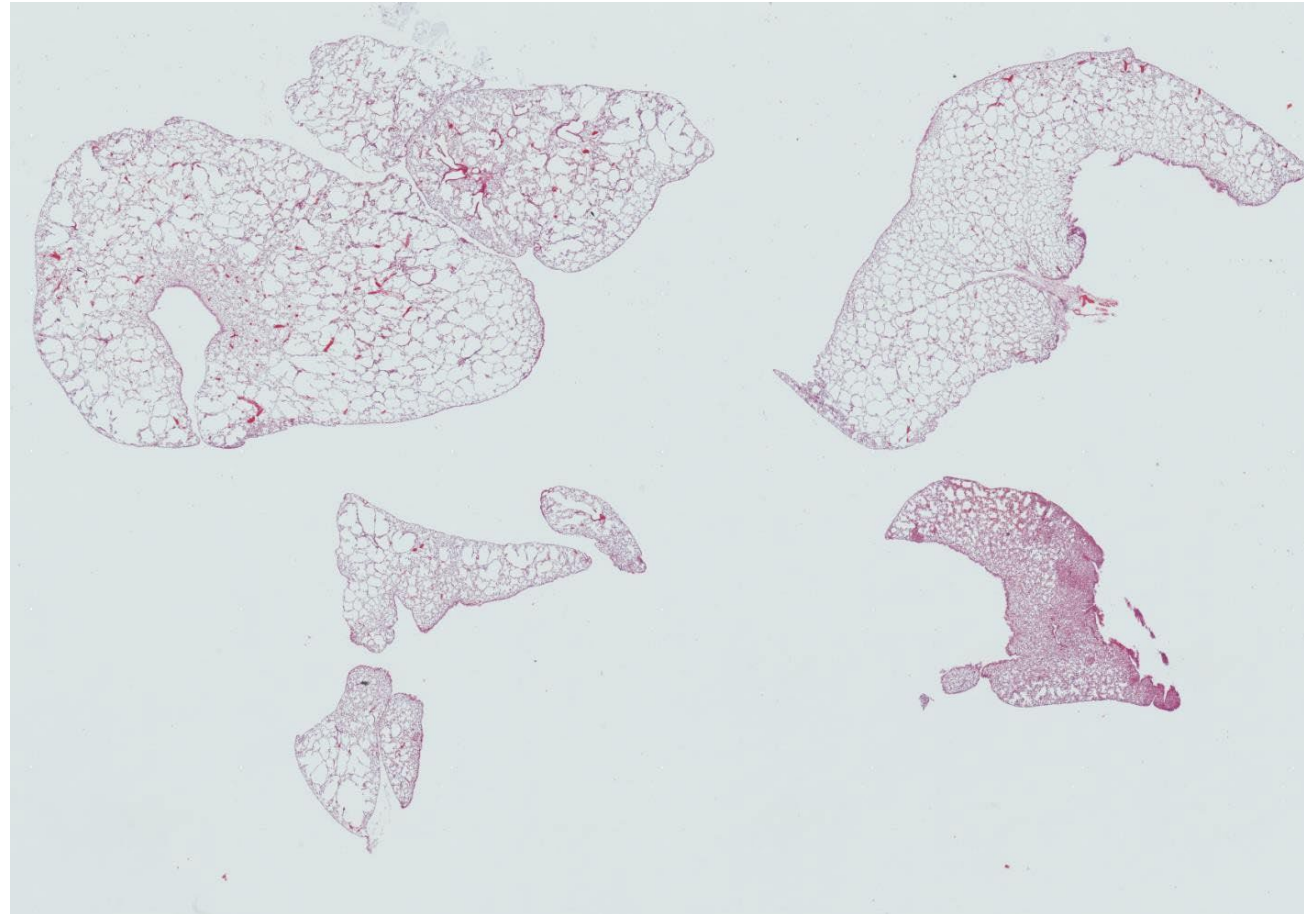

2677 AAT-KO 0.5 U

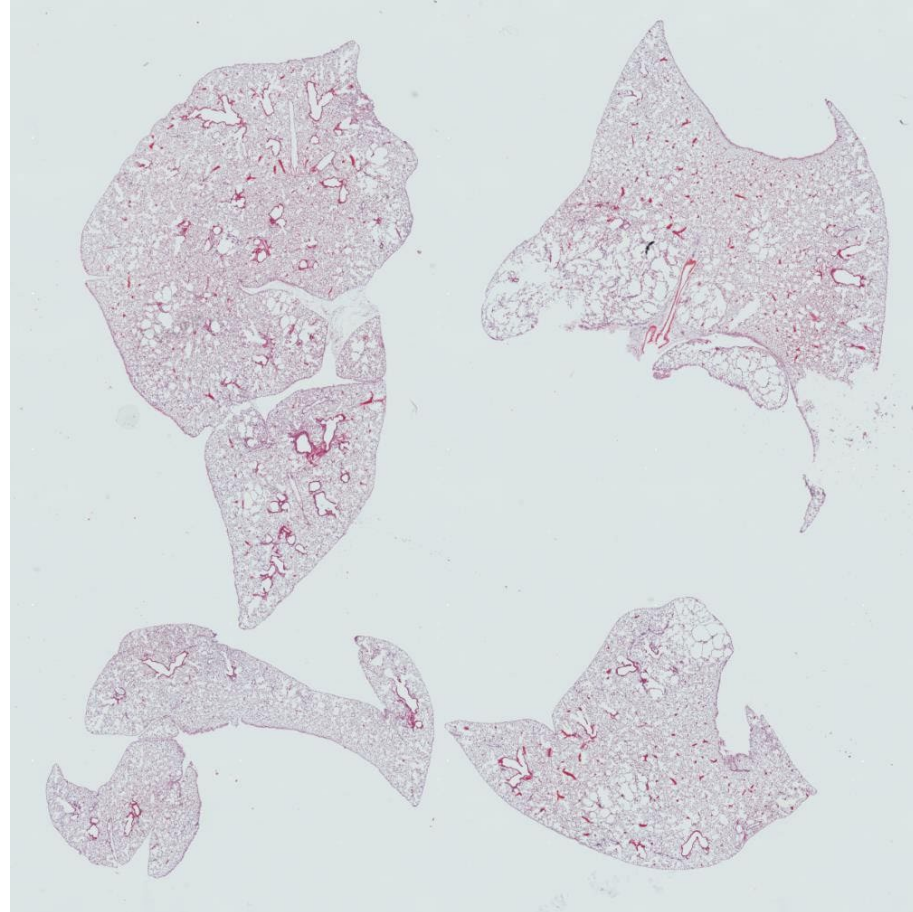

2680 AAT-KO 0.5 U

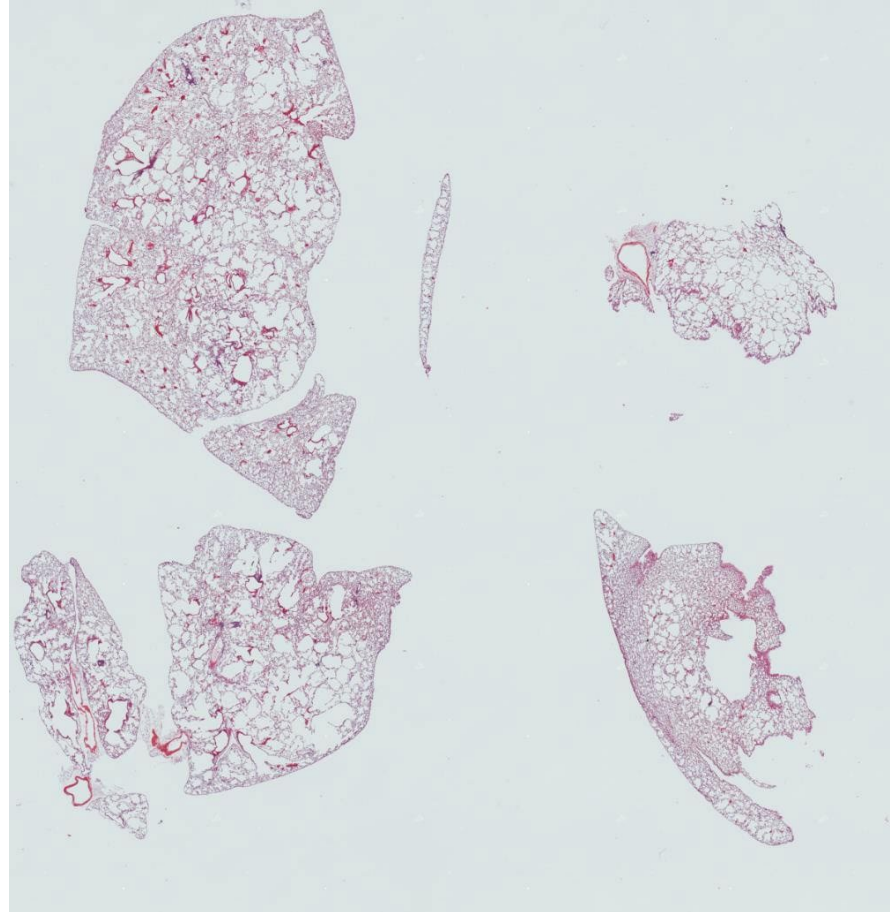

2685 AAT-KO 1.0 U

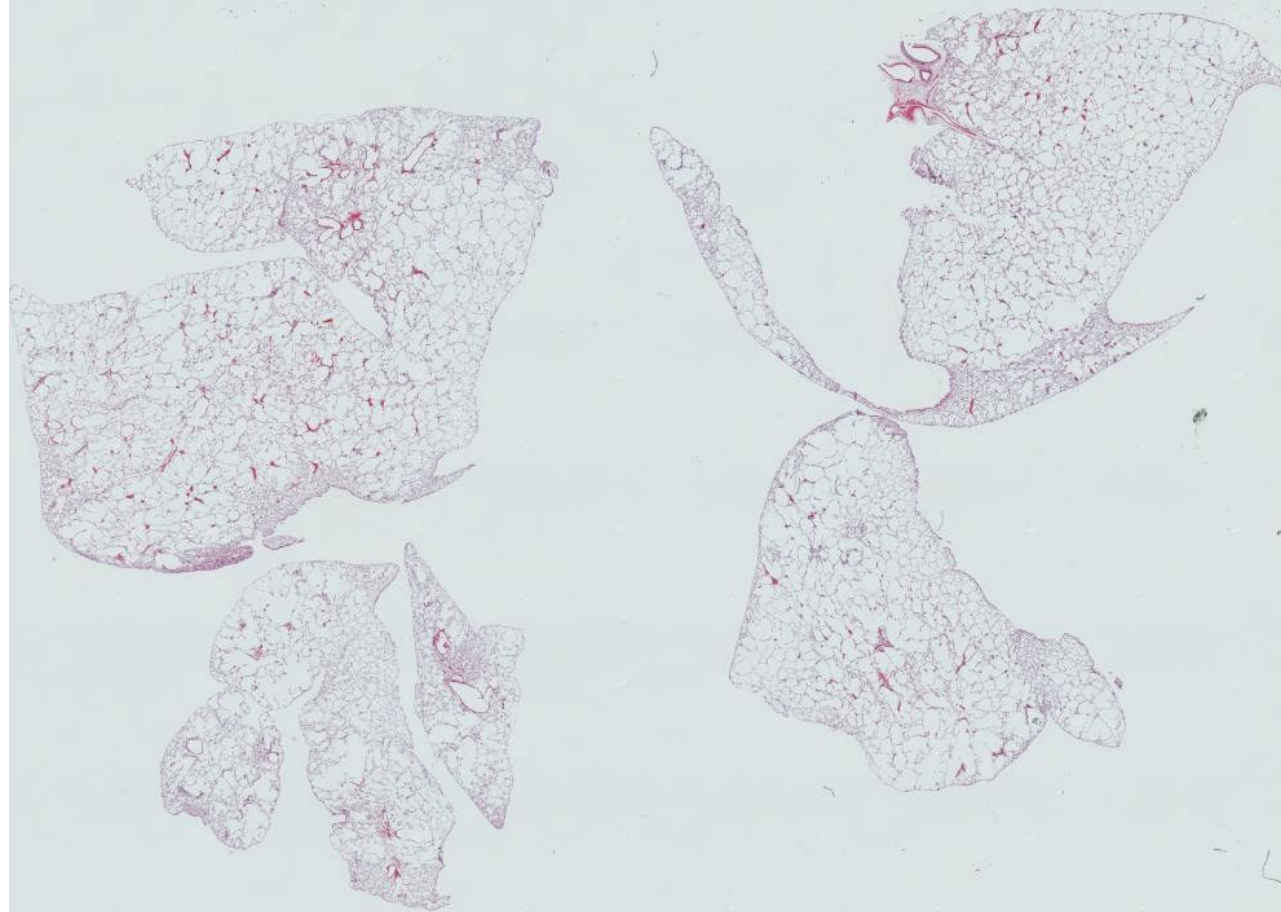

2729 AAT-KO 1.0 U

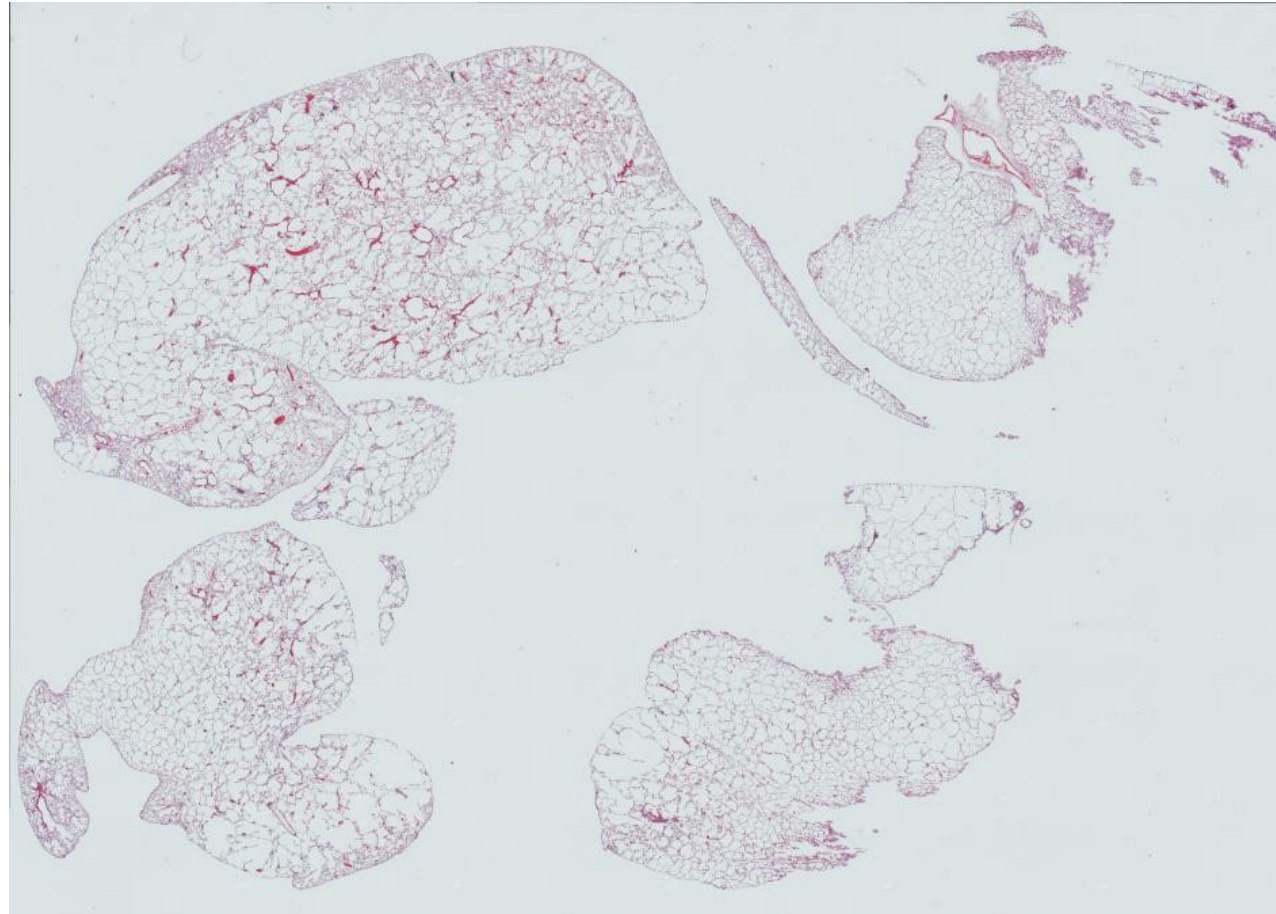

2686 AAT-KO 1.0 U

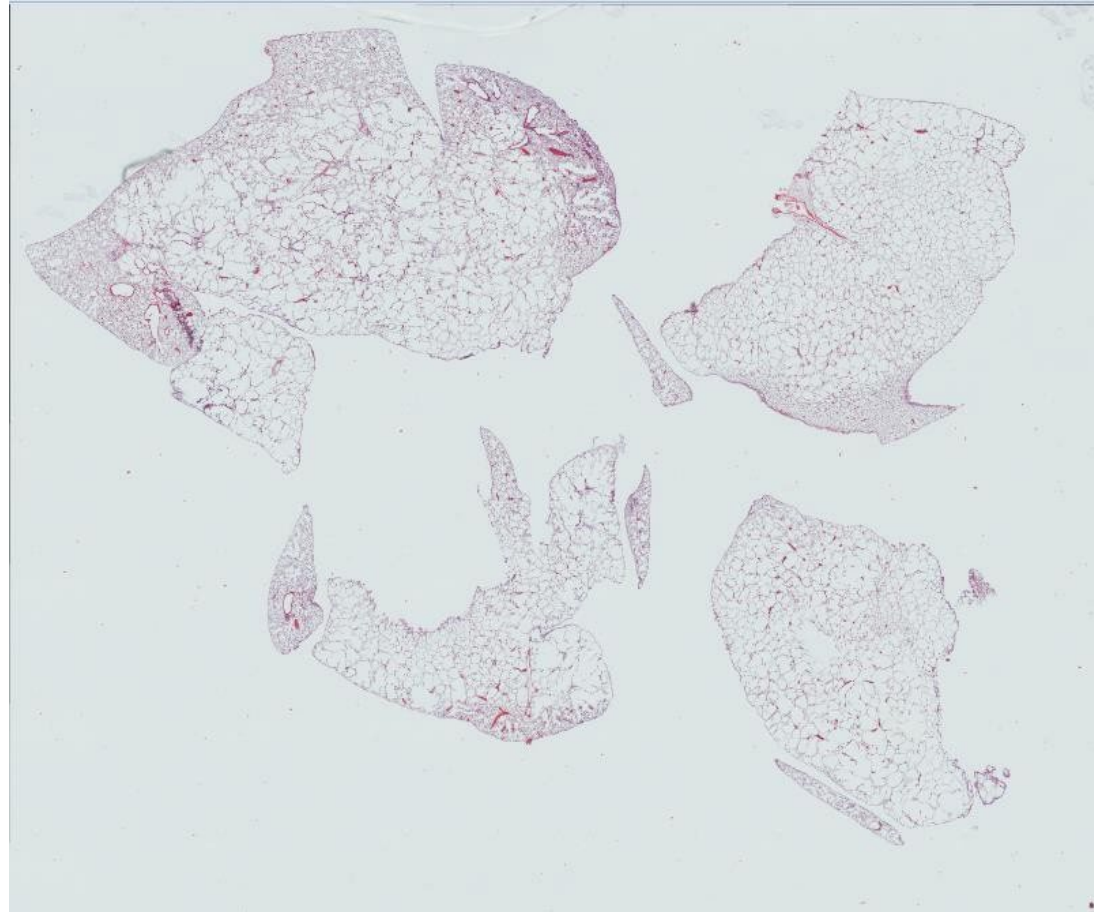



2687 AAT-KO 1.0 U

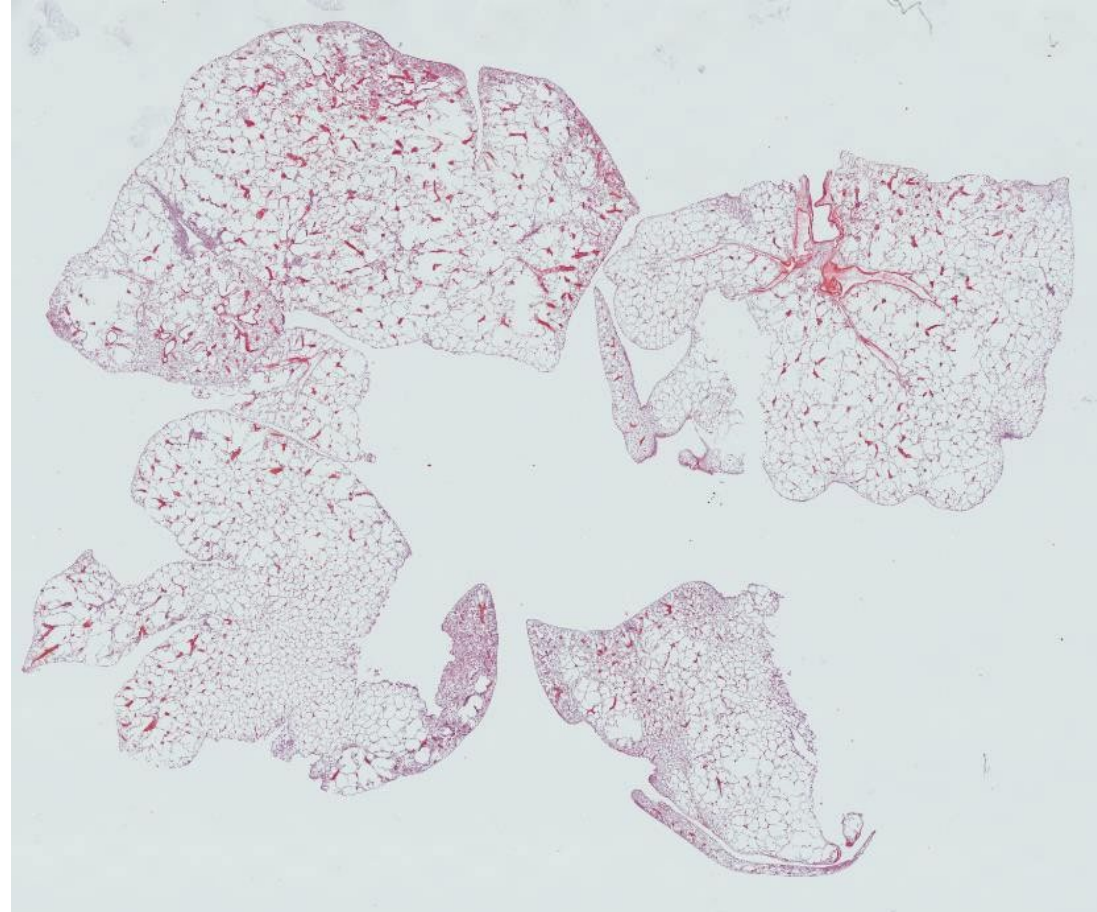

2681 AAT-KO 2.0 U

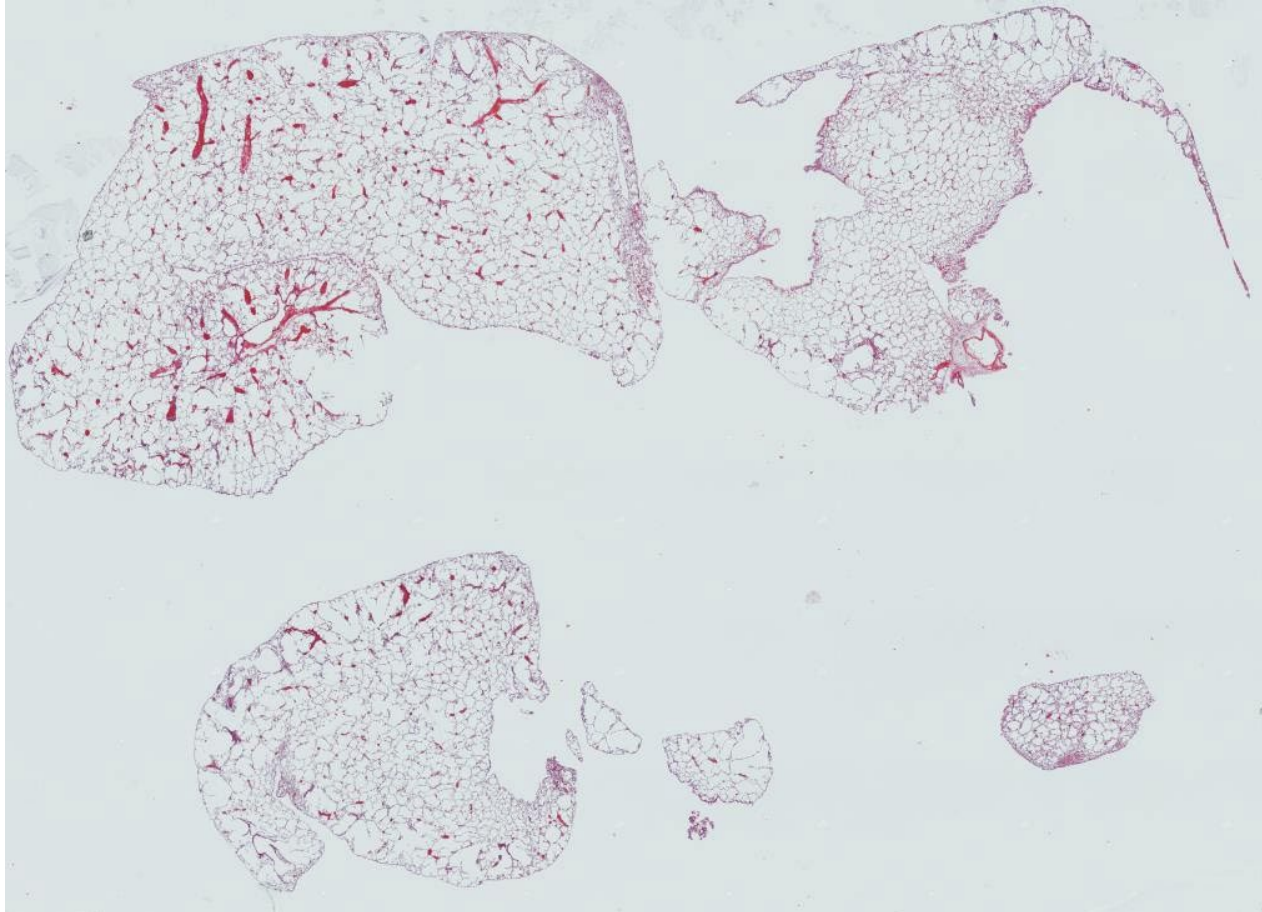

2682 AAT-KO 2.0 U

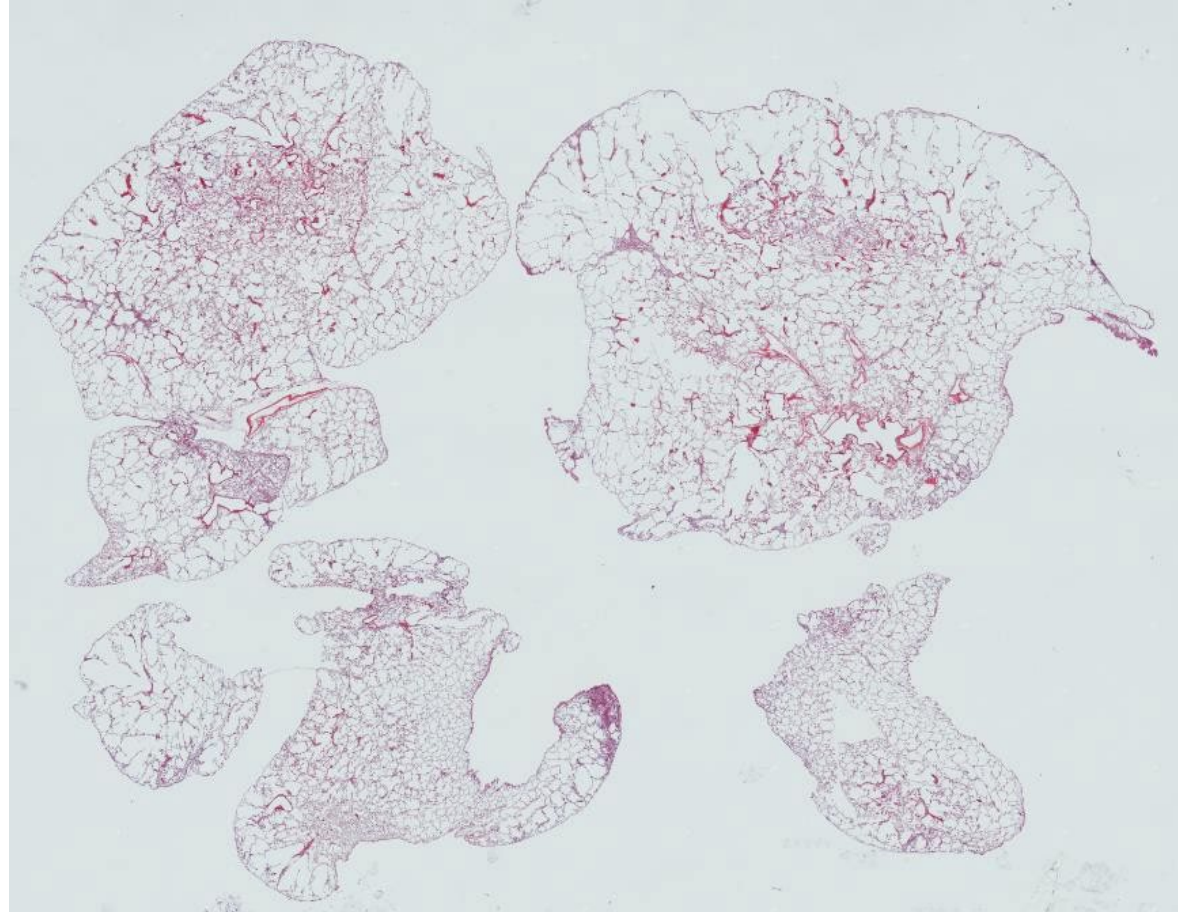

2678 AAT-KO PBS

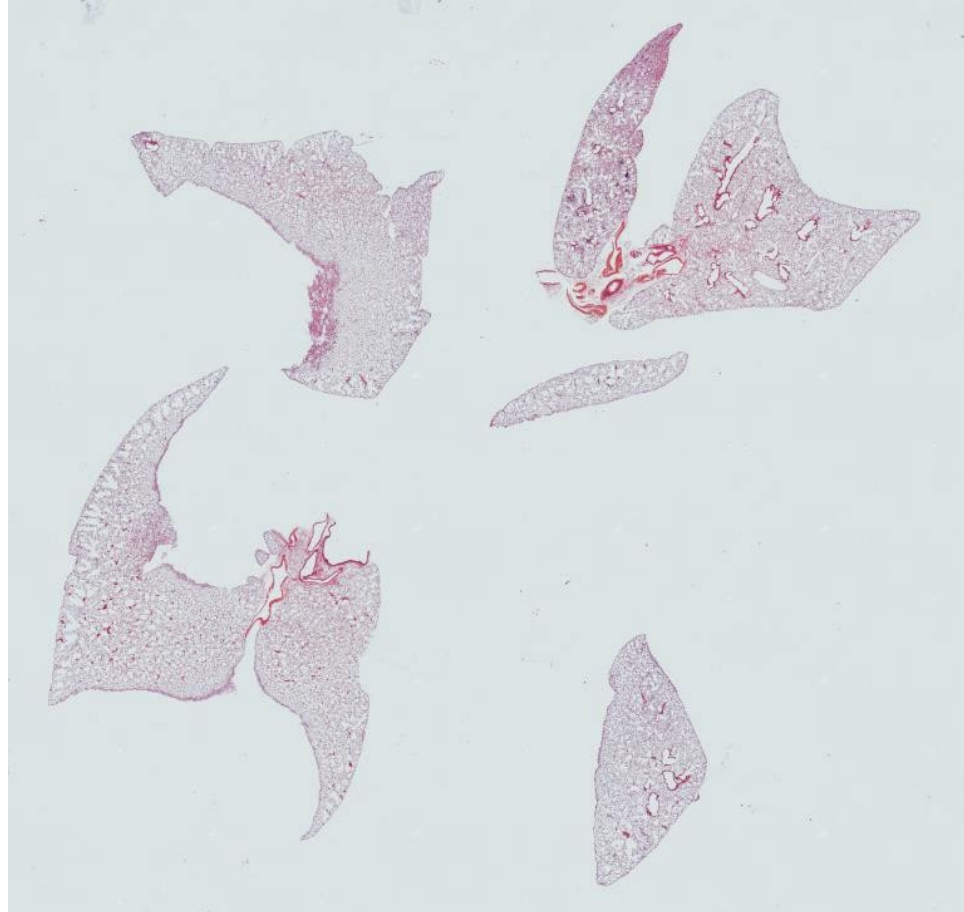

# 2723 AAT-KO PBS

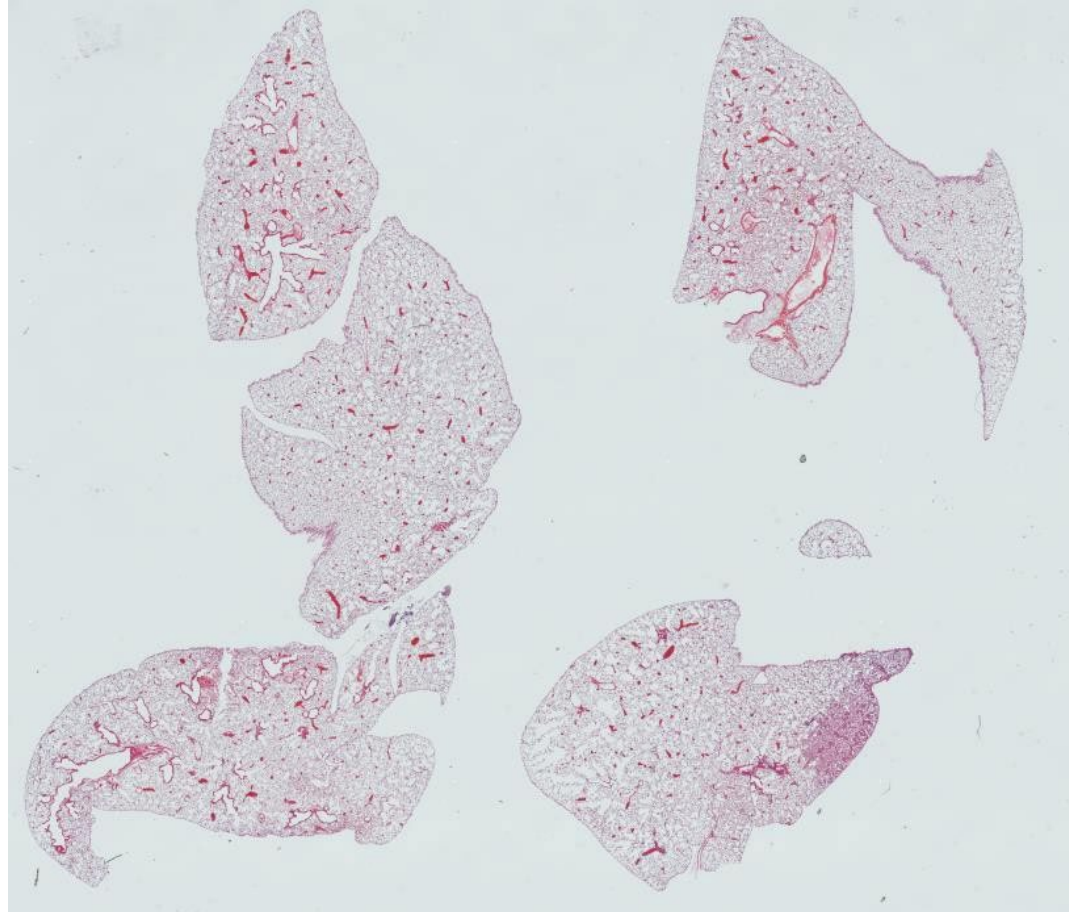

# 2727 AAT-KO PBS

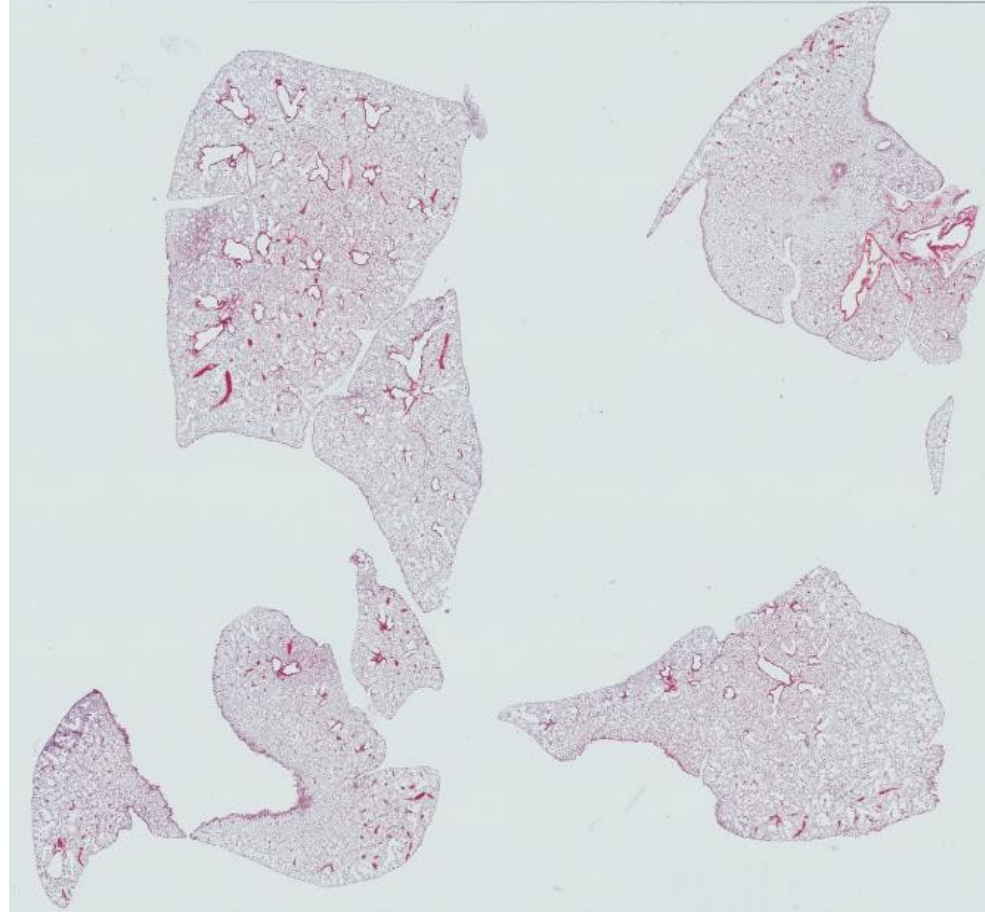

2453 WT 0.25 U

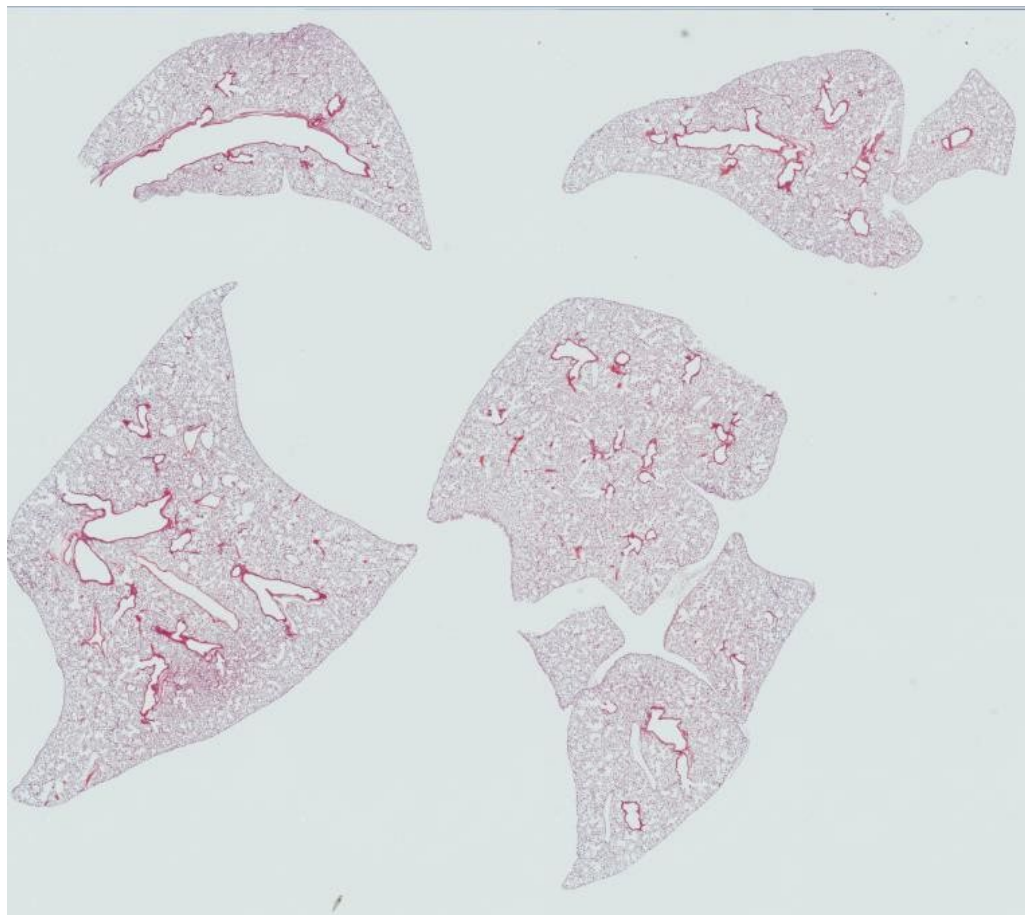

2452 WT 0.25 U

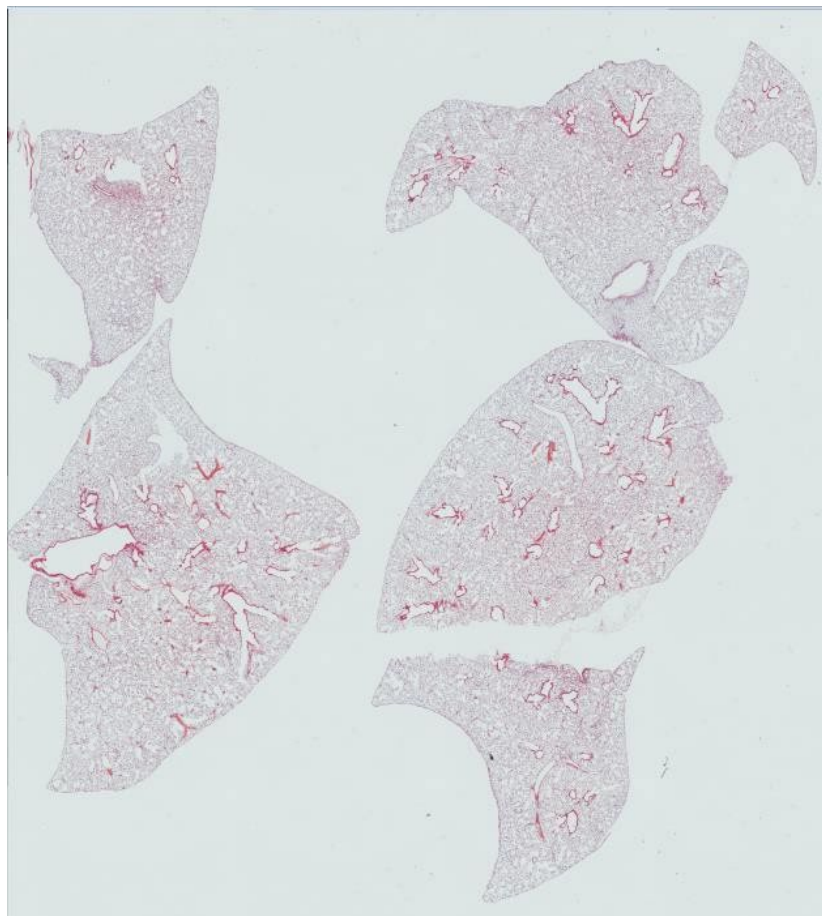



2559 WT 0.25 U

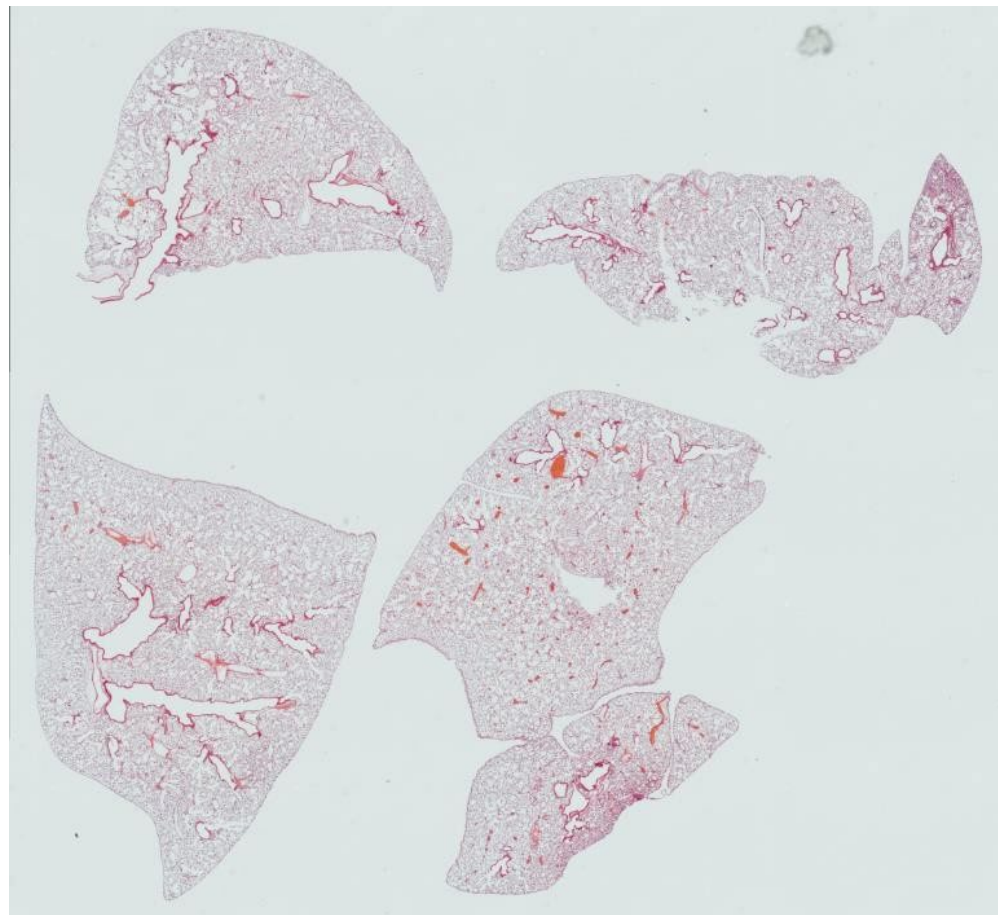

2451 WT 0.5 U

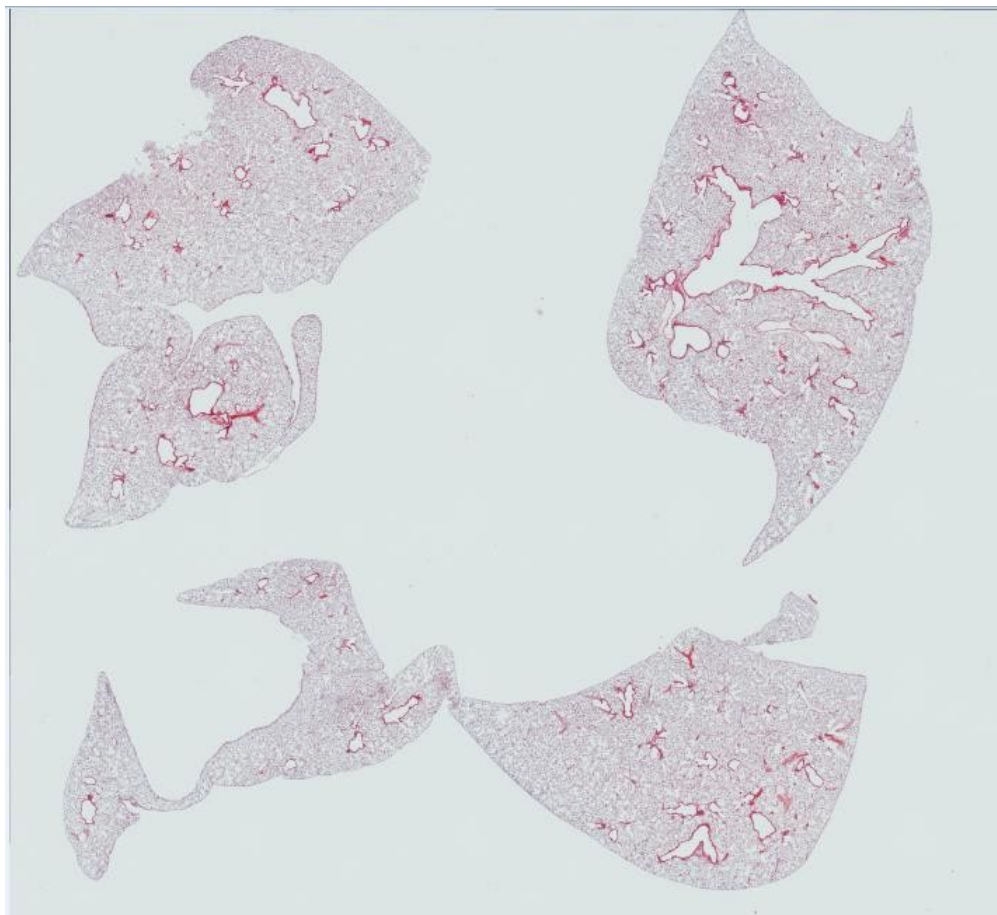

2448 WT 0.5 U

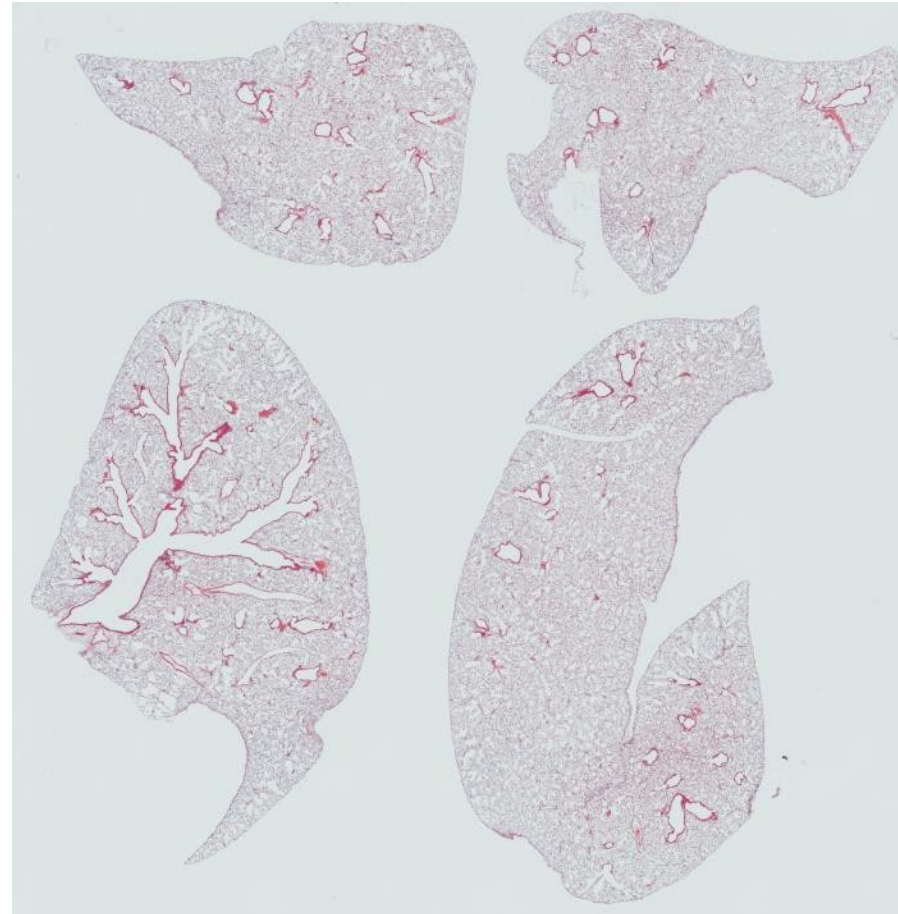

2558 WT 0.5 U

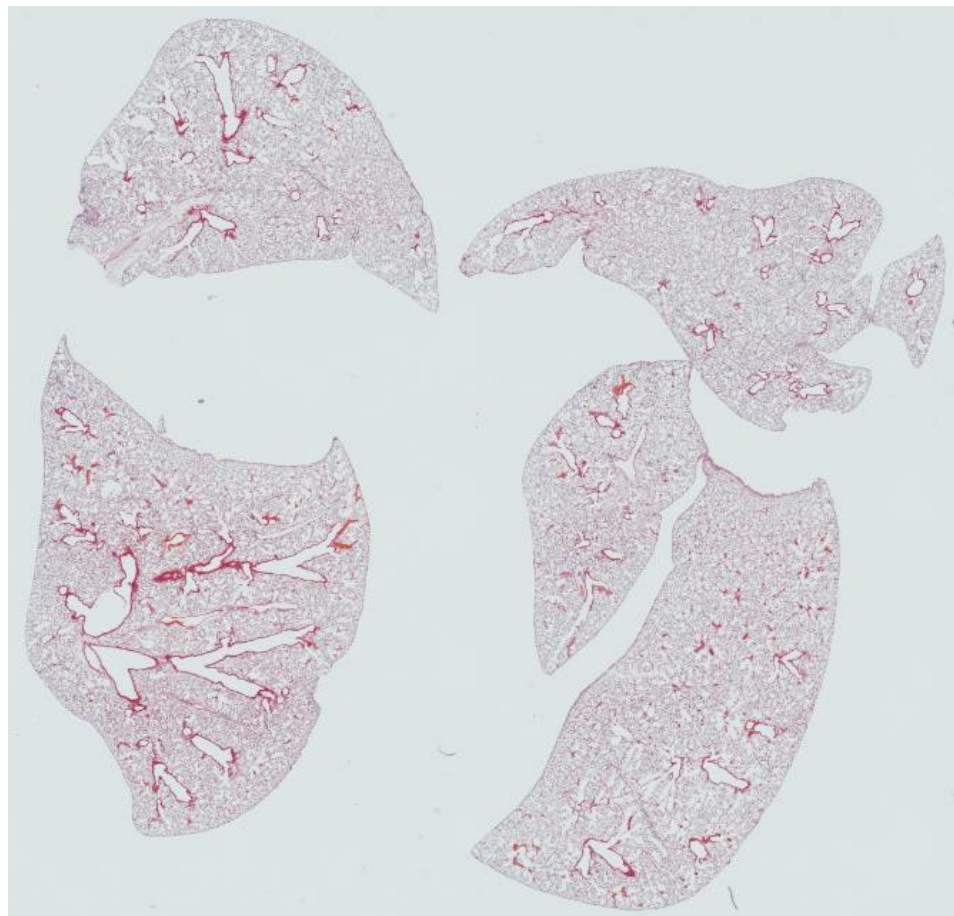

2555 WT 1.0U

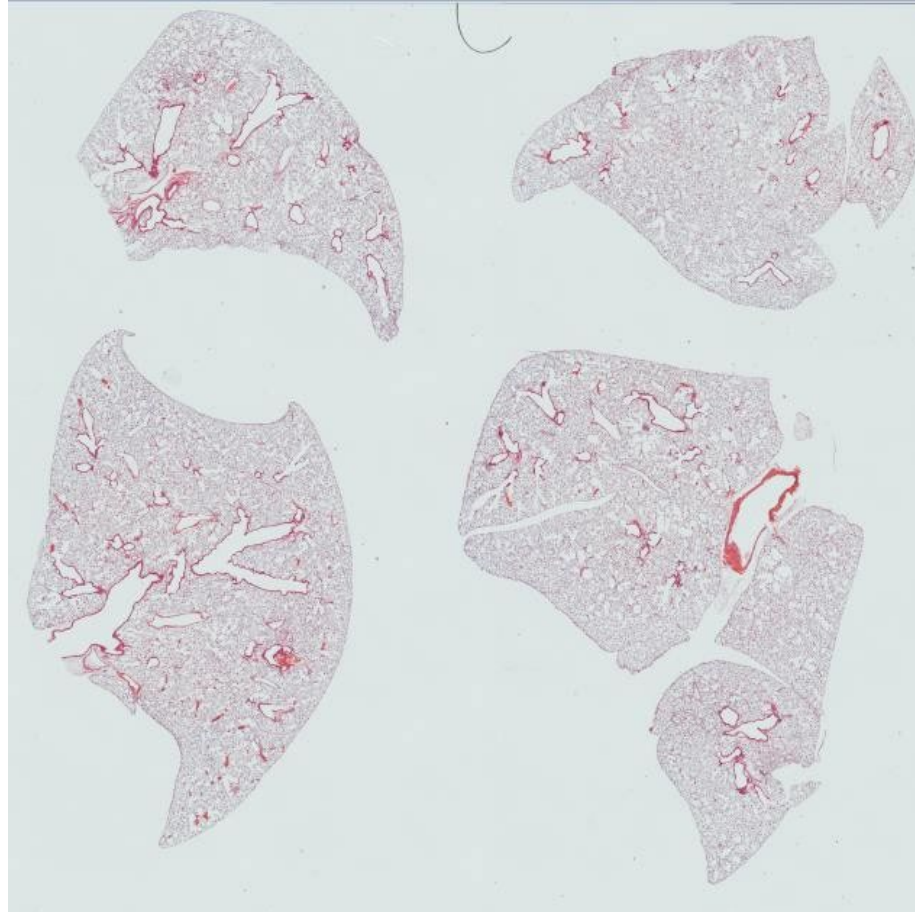

2556 WT 1.0U

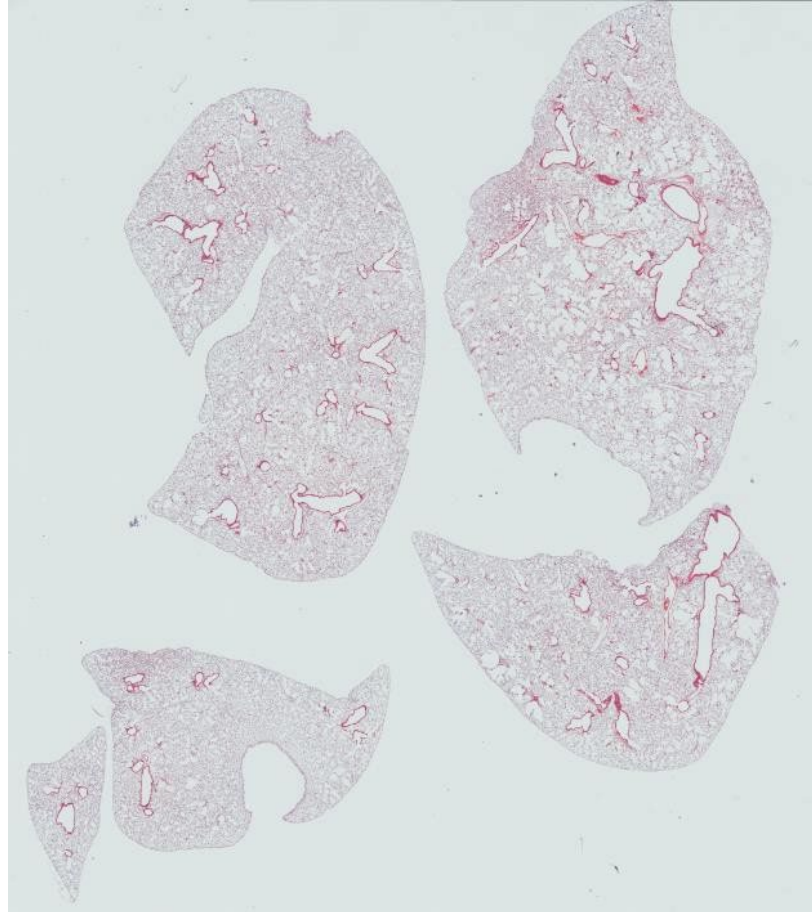

2557 WT 1.0U

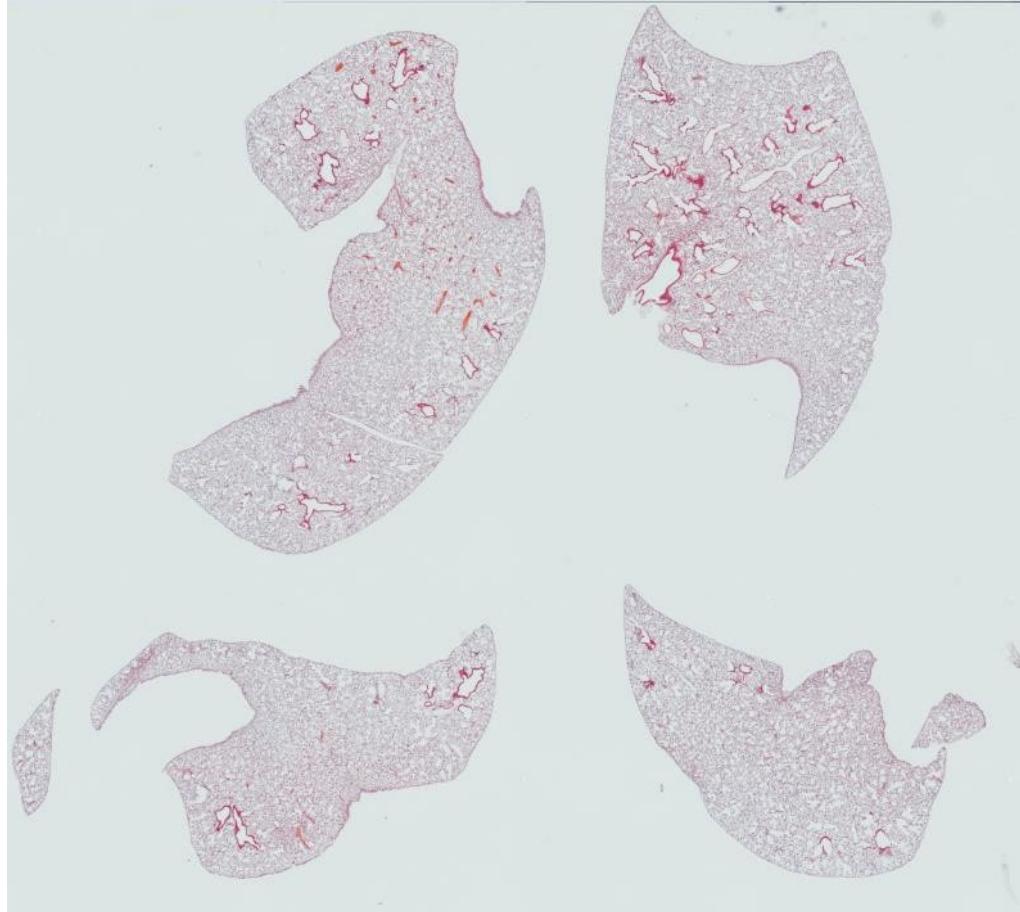

2458 WT 2.0U

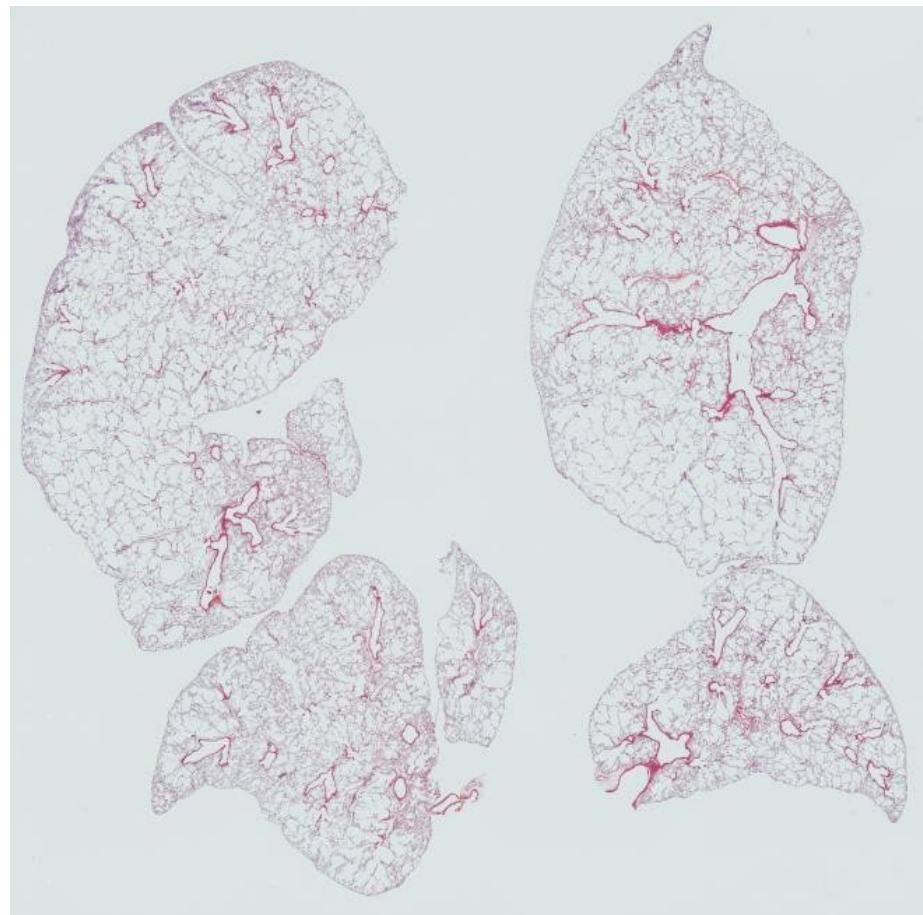



2446 WT 2.0 U

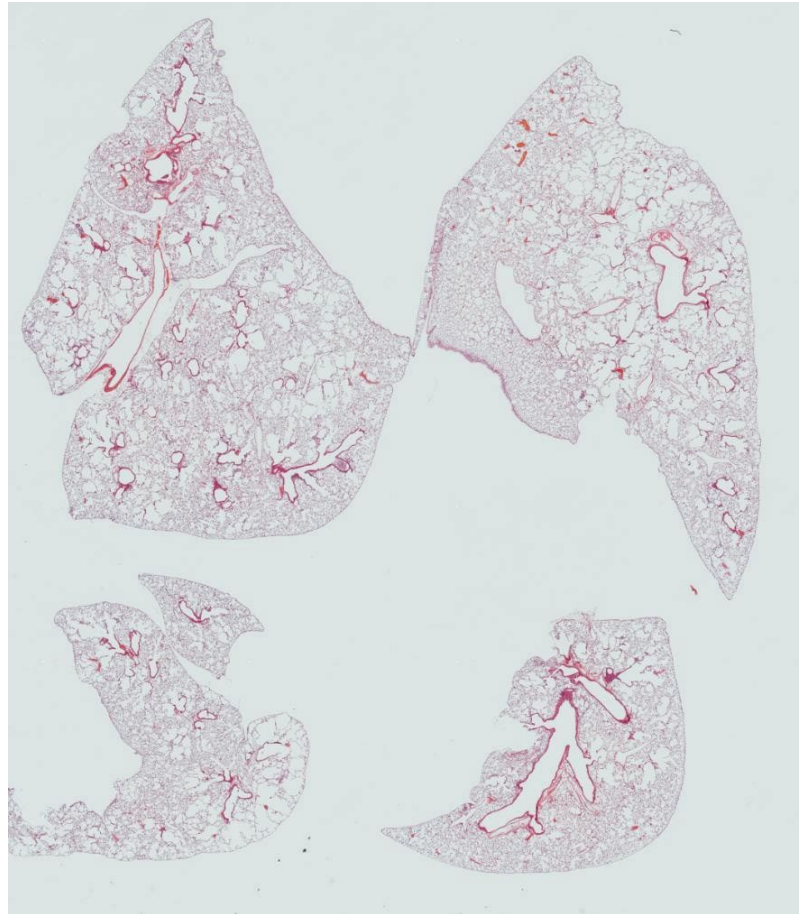

2456 WT 5.0 U

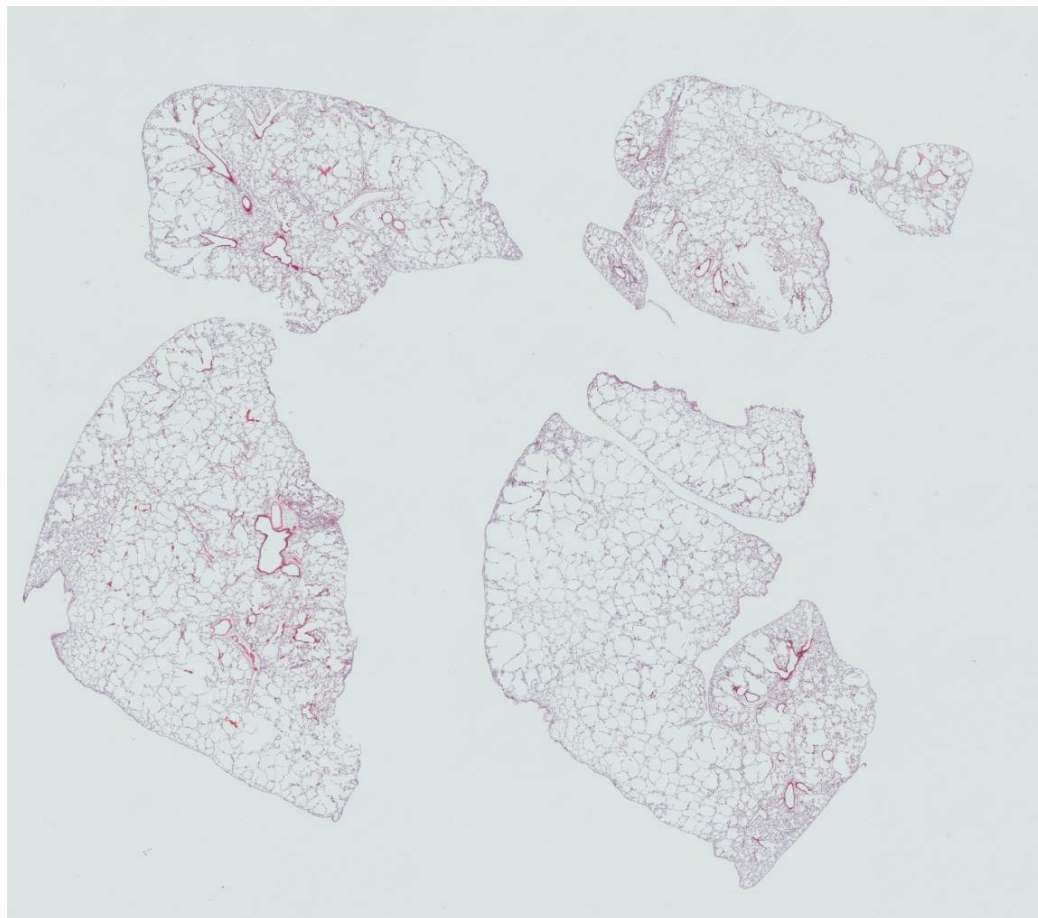

2445 WT 5.0 U

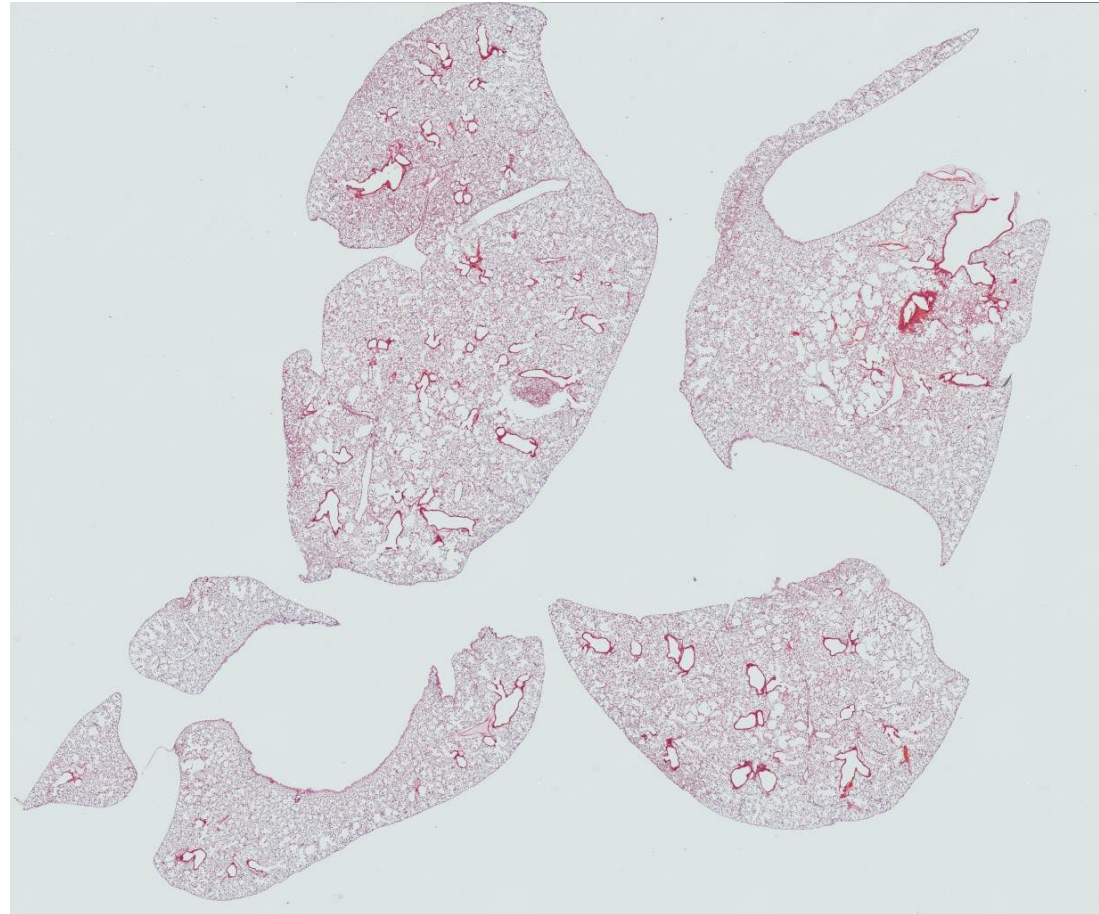

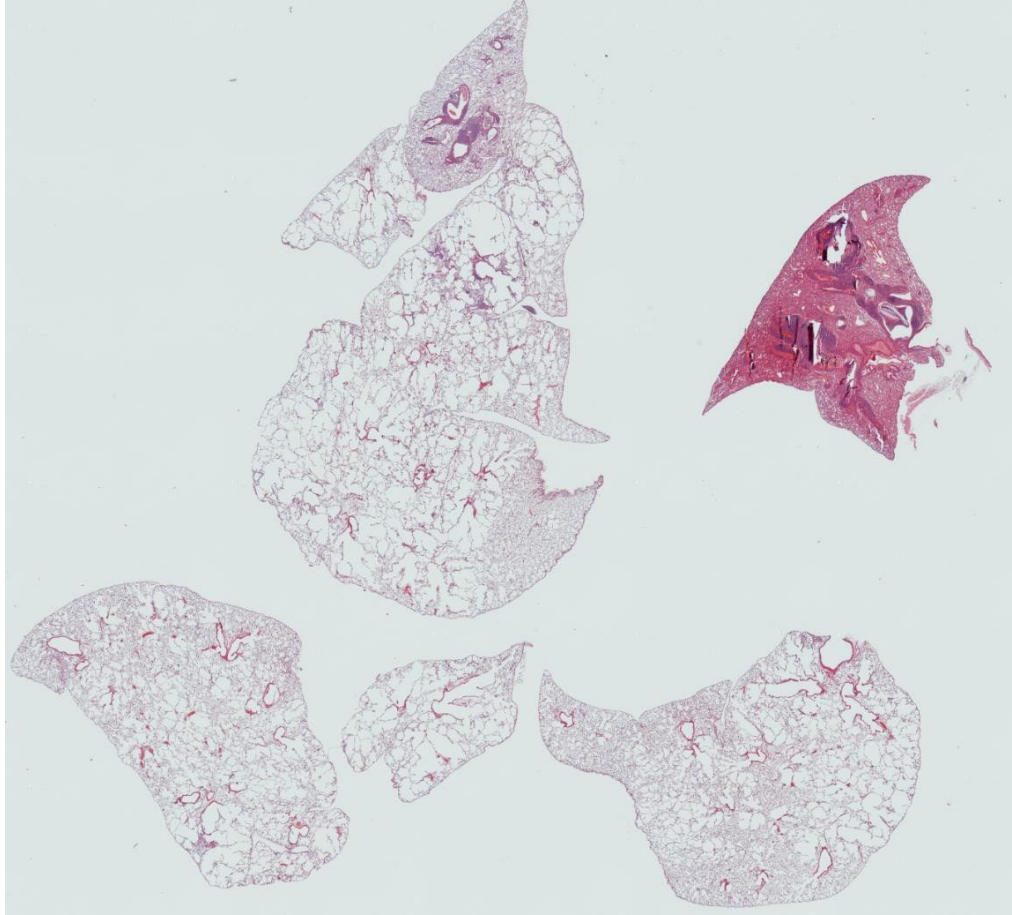

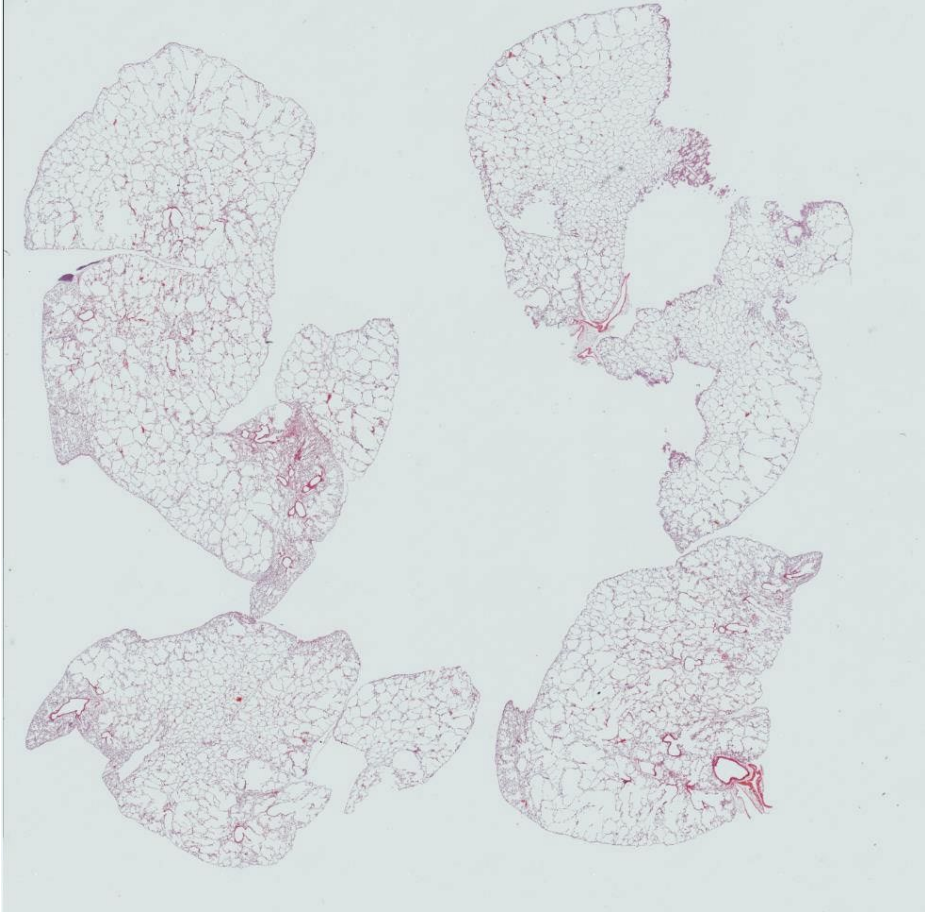

# Supplemental Figure 3

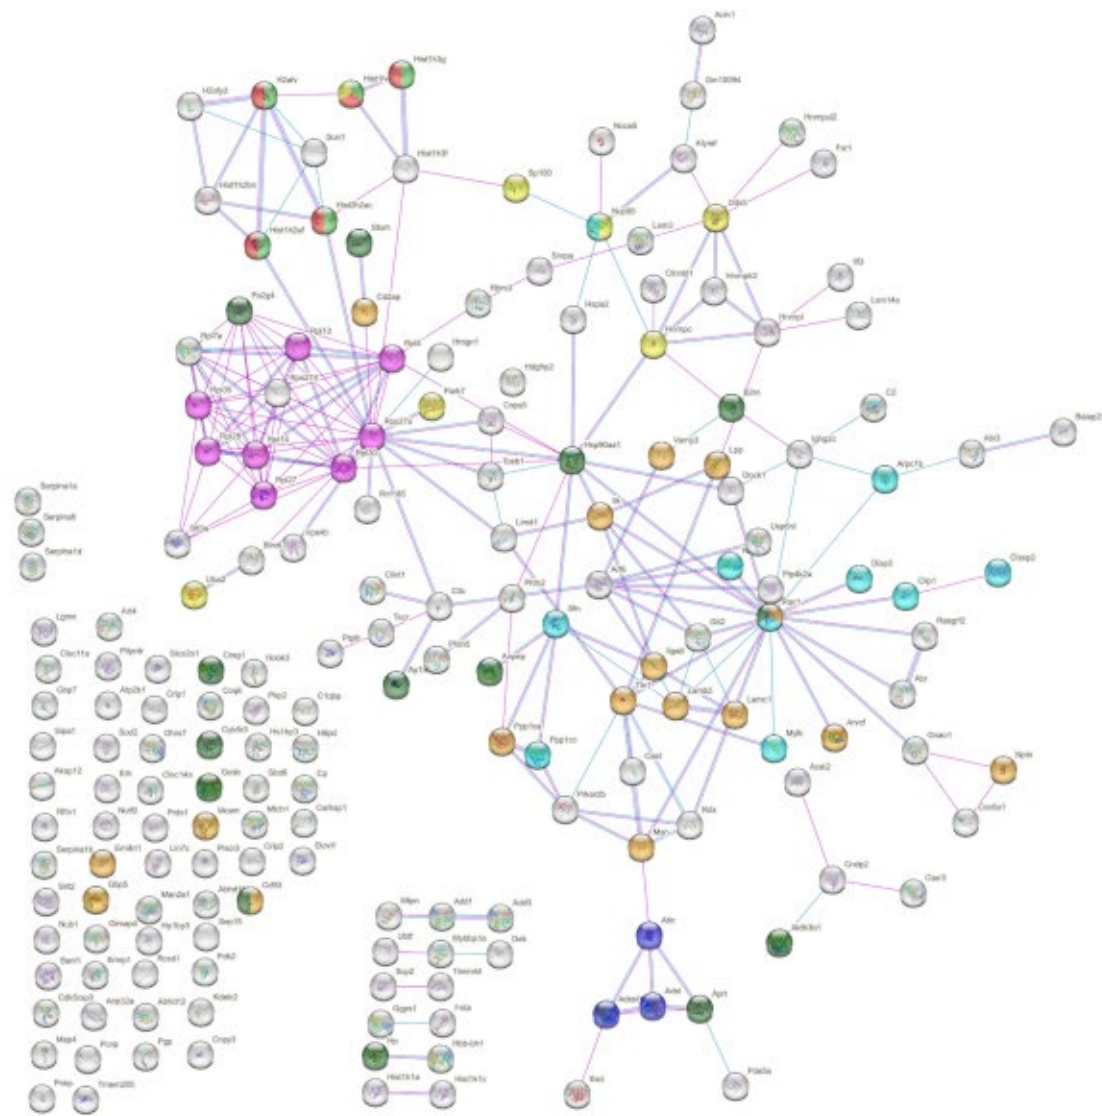

| pathway     | description                                                   | count in network | strength | false discovery rate |
|-------------|---------------------------------------------------------------|------------------|----------|----------------------|
| MMU-73817   | Purine ribonucleoside monophosphate biosynthesis              | 3 of 12          | 1.47     | 0.0095               |
| MMU-110330  | Recognition and association of DNA glycosylase with site c... | 5 of 33          | 1.26     | 0.0016               |
| MMU-9670095 | Inhibition of DNA recombination at telomere                   | 5 of 34          | 1.24     | 0.0017               |
| MMU-110331  | Cleavage of the damaged purine                                | 5 of 35          | 1.23     | 0.0018               |
| MMU-2299718 | Condensation of Prophase Chromosomes                          | 5 of 38          | 1.2      | 0.0019               |
| MMU-212300  | PRC2 methylates histones and DNA                              | 5 of 40          | 1.17     | 0.0022               |
| MMU-5689901 | Metalloprotease DUBs                                          | 3 of 26          | 1.14     | 0.0493               |
| MMU-1799339 | SRP-dependent cotranslational protein targeting to membra...  | 9 of 88          | 1.09     | 0.00019              |
| MMU-8936499 | RUNX1 regulates genes involved in megakaryocyte different...  | 5 of 48          | 1.09     | 0.0041               |
| MMU-975956  | Nonsense Mediated Decay (NMD) independent of the Exon Ju...   | 9 of 90          | 1.08     | 0.00019              |
| MMU-2559586 | DNA Damage/Telomere Stress Induced Senescence                 | 6 of 59          | 1.08     | 0.0017               |
| MMU-212165  | Epigenetic regulation of gene expression                      | 7 of 71          | 1.07     | 0.00054              |
| MMU-3214858 | RMTs methylate histone arginines                              | 4 of 41          | 1.07     | 0.0191               |
| MMU-72689   | Formation of a pool of free 40S subunits                      | 9 of 97          | 1.04     | 0.00019              |
| MMU-73884   | Base Excision Repair                                          | 6 of 70          | 1.01     | 0.0025               |
| MMU-72706   | GTP hydrolysis and joining of the 60S ribosomal subunit       | 9 of 108         | 1.0      | 0.00019              |
| MMU-156827  | L13a-mediated translational silencing of Ceruloplasmin exp... | 9 of 107         | 1.0      | 0.00019              |
| MMU-975957  | Nonsense Mediated Decay (NMD) enhanced by the Exon Ju...      | 9 of 110         | 0.99     | 0.00019              |
| MMU-75153   | Apoptotic execution phase                                     | 4 of 49          | 0.99     | 0.0314               |
| MMU-606279  | Deposition of new CENPA-containing nucleosomes at the c...    | 4 of 52          | 0.96     | 0.0365               |
| MMU-68875   | Mitotic Prophase                                              | 7 of 96          | 0.94     | 0.0018               |
| MMU-3214815 | HDACs deacetylate histones                                    | 4 of 55          | 0.94     | 0.0428               |
| MMU-6806834 | Signaling by MET                                              | 5 of 78          | 0.88     | 0.0219               |
| MMU-5357801 | Programmed Cell Death                                         | 7 of 116         | 0.86     | 0.0041               |
| MMU-2559583 | Cellular Senescence                                           | 7 of 124         | 0.83     | 0.0055               |
| MMU-6791226 | Major pathway of rRNA processing in the nucleolus and cyt...  | 9 of 171         | 0.8      | 0.0018               |
| MMU-2993846 | SUMOylation                                                   | 7 of 150         | 0.79     | 0.0136               |
| MMU-72163   | mRNA Splicing - Major Pathway                                 | 8 of 178         | 0.73     | 0.0073               |
| MMU-5663220 | RHO GTPases Activate Formins                                  | 6 of 133         | 0.73     | 0.0337               |
| MMU-199258  | RHO GTPase Effectors                                          | 18 of 246        | 0.69     | 0.0033               |
| MMU-3108232 | SUMO E3 ligases SUMOylate target proteins                     | 8 of 145         | 0.69     | 0.0478               |
| MMU-68886   | M Phase                                                       | 14 of 364        | 0.66     | 0.0054               |
| MMU-72203   | Processing of Capped Intron-Containing Pre-mRNA               | 9 of 234         | 0.66     | 0.0086               |
| MMU-2262752 | Cellular responses to stress                                  | 14 of 395        | 0.63     | 0.0011               |
| MMU-8953854 | Metabolism of RNA                                             | 19 of 556        | 0.61     | 0.00019              |
| MMU-194315  | Signaling by Rho GTPases                                      | 13 of 381        | 0.61     | 0.0019               |
| MMU-422475  | Axon guidance                                                 | 9 of 278         | 0.59     | 0.0231               |
| MMU-73894   | DNA Repair                                                    | 9 of 293         | 0.56     | 0.0314               |
| MMU-6796695 | Neutrophil degranulation                                      | 14 of 519        | 0.51     | 0.0069               |
| MMU-1640170 | Cell Cycle                                                    | 15 of 574        | 0.49     | 0.0060               |
| MMU-168249  | Innate Immune System                                          | 21 of 949        | 0.42     | 0.0033               |
| MMU-392499  | Metabolism of proteins                                        | 27 of 1609       | 0.3      | 0.0181               |
| MMU-168256  | Immune System                                                 | 27 of 1621       | 0.3      | 0.0194               |
| GO:0022610  | Biological adhesion                                           | 17 of 791        | 0.43     | 0.0450               |
| GO:0003735  | Structural constituent of ribosome                            | 8 of 155         | 0.79     | 0.0171               |

# Supplemental Figure 4

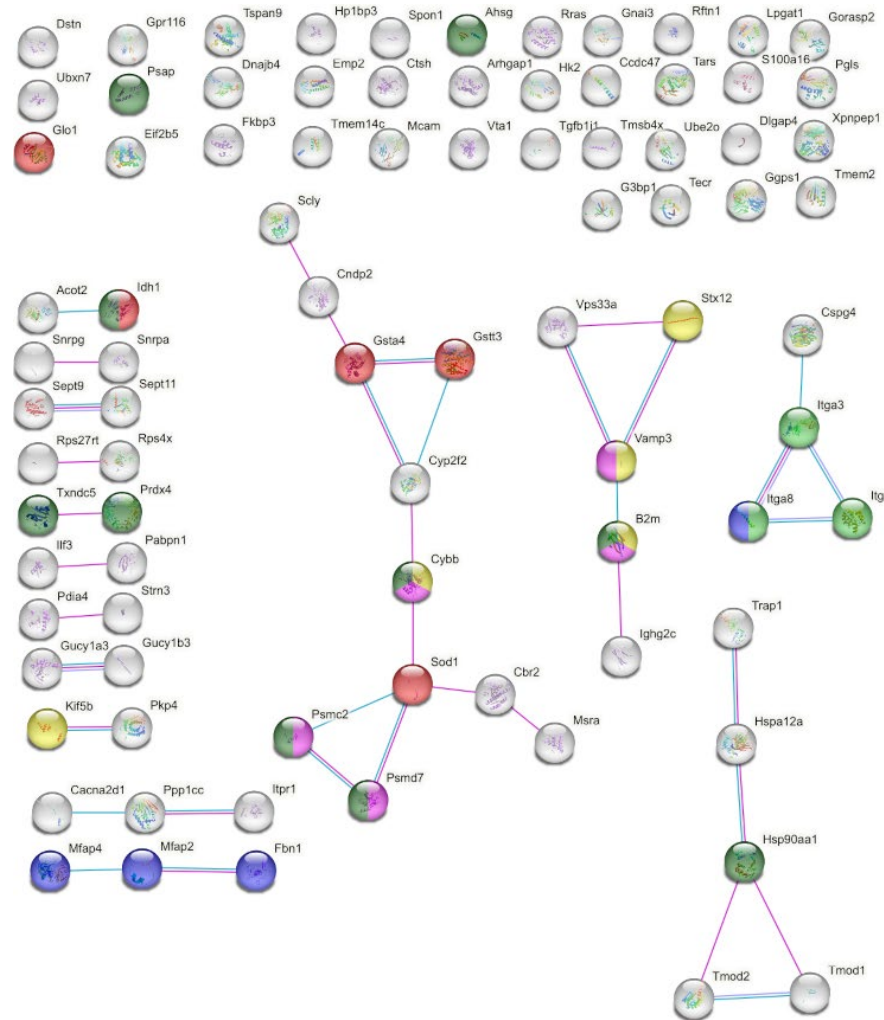

| pathway     | description                              | count in network | strength | false discovery rate |
|-------------|------------------------------------------|------------------|----------|----------------------|
| MMU-2129379 | Molecules associated with elastic fibres | 4 of 35          | 1.47     | 0.0255               |
| MMU-1236975 | Antigen processing-Cross presentation    | 5 of 92          | 1.14     | 0.0255               |
| MMU-6798695 | Neutrophil degranulation                 | 10 of 519        | 0.69     | 0.0255               |
| GO:0006749  | Glutathione metabolic process            | 5 of 53          | 1.38     | 0.0155               |
| GO:0008305  | Integrin complex                         | 3 of 30          | 1.41     | 0.0301               |
| GO:0045335  | Phagocytic vesicle                       | 5 of 112         | 1.06     | 0.0134               |
